# Supplementary material for: In silico characterization and homology modeling of cytosolic APX gene predicts novel glycine residue modulating waterlogging stress response in pigeon pea
Source: PeerJ journal article supplement (doi:10.7717/peerj.10888), 2021-05-12

**Fig. S4:** Ramachandran plots of a) all residue types, b) main chain bond length, c) main chain properties, d) side chain properties, e) residue properties, f) RMS distance from planarity and g) chi1-chi2 plots in ICP 7035 and ICPL 84023

**a) Ramachandran plots of all residue types in ICP 7035 in pigeon pea**

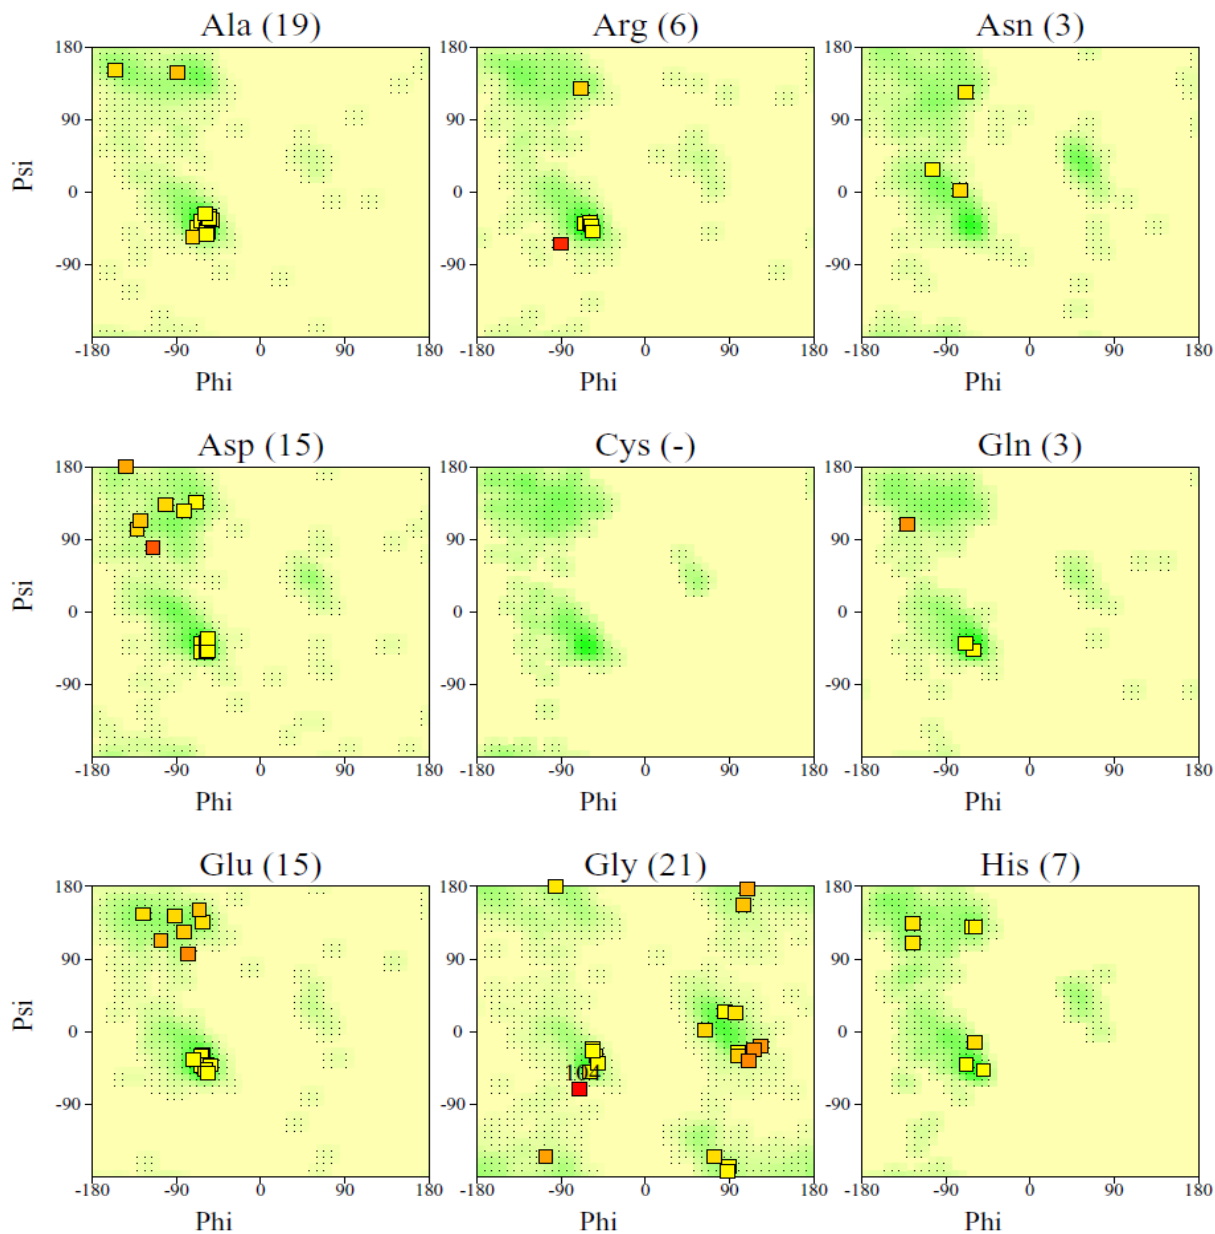

Numbers of residues are shown in brackets. Those in unfavourable conformations (score < -3.00) are labelled. Shading shows favourable conformations as obtained from an analysis of 163 structures at resolution 2.0Å or better.

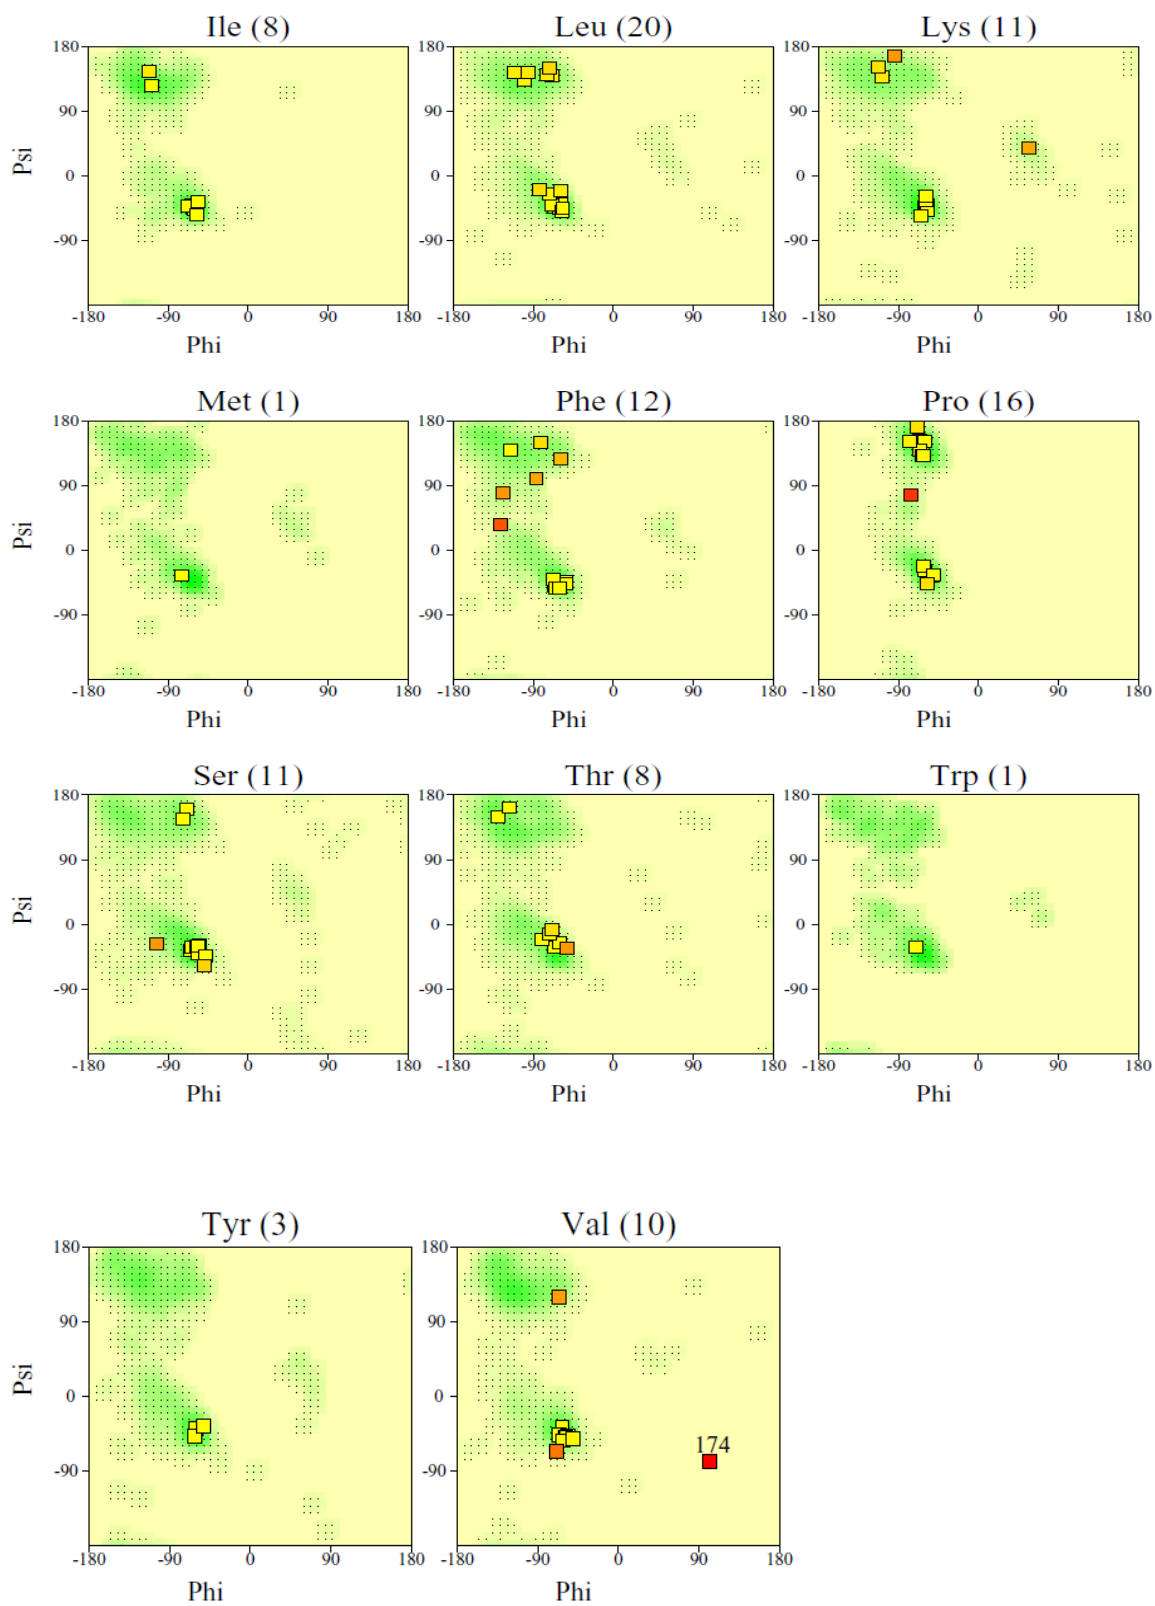

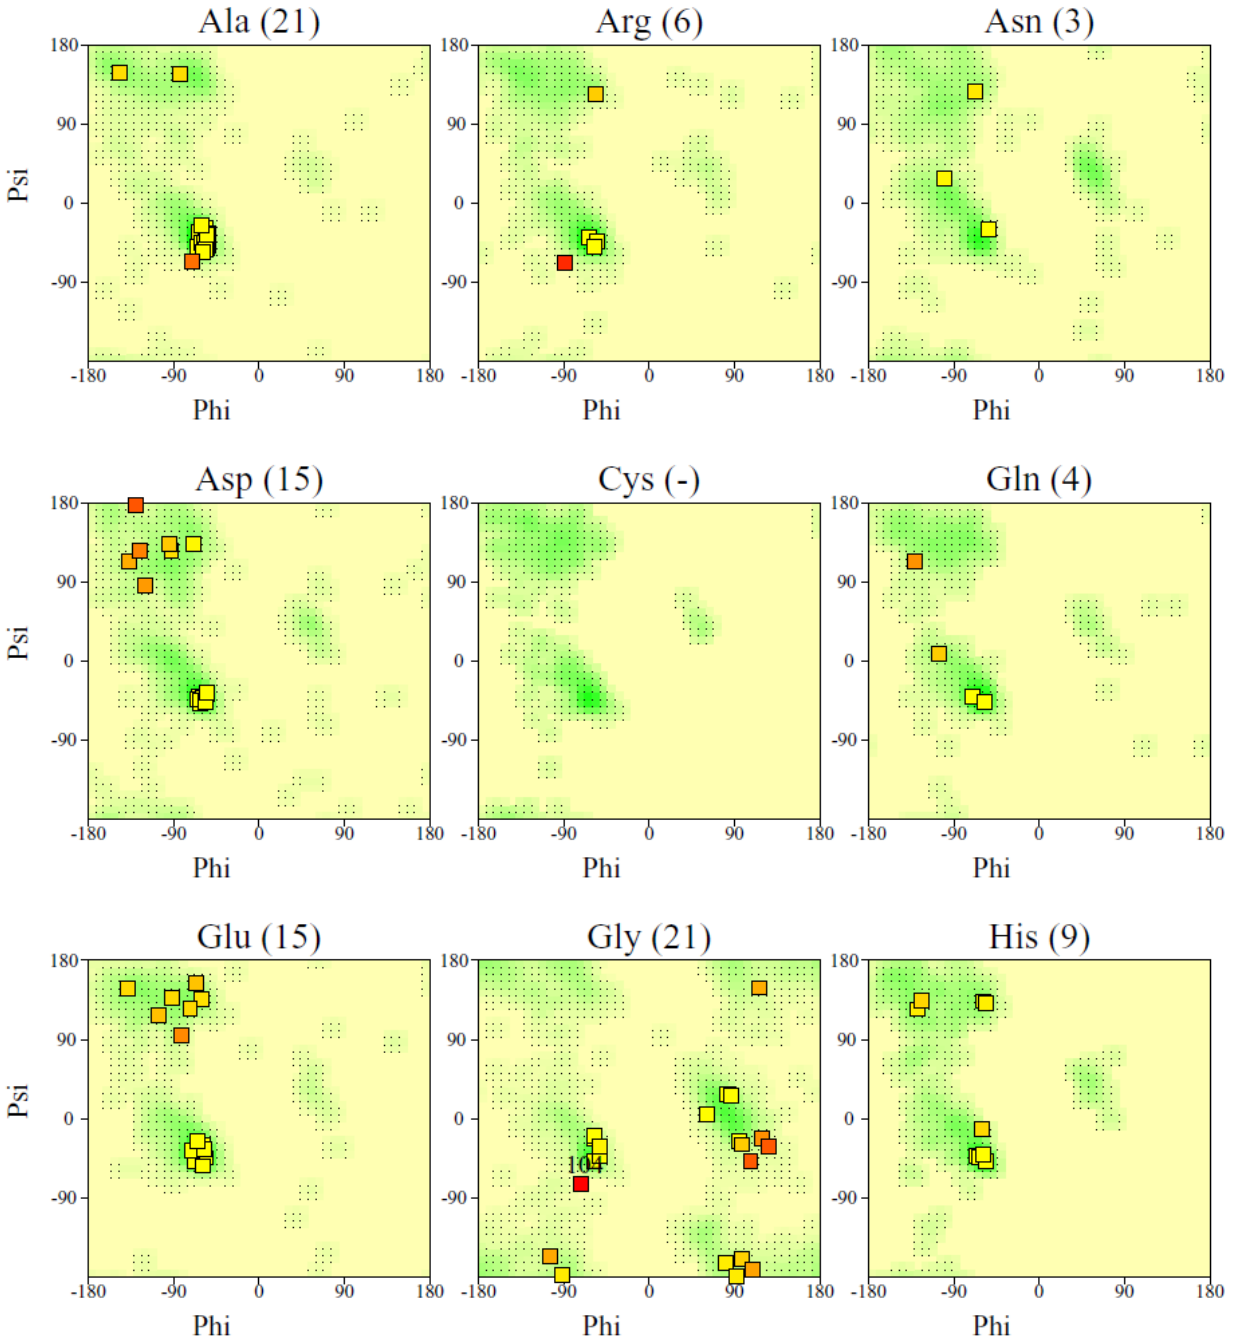

Numbers of residues are shown in brackets. Those in unfavourable conformations (score  $< -3.00$ ) are labelled. Shading shows favourable conformations as obtained from an analysis of 163 structures at resolution 2.0Å or better.

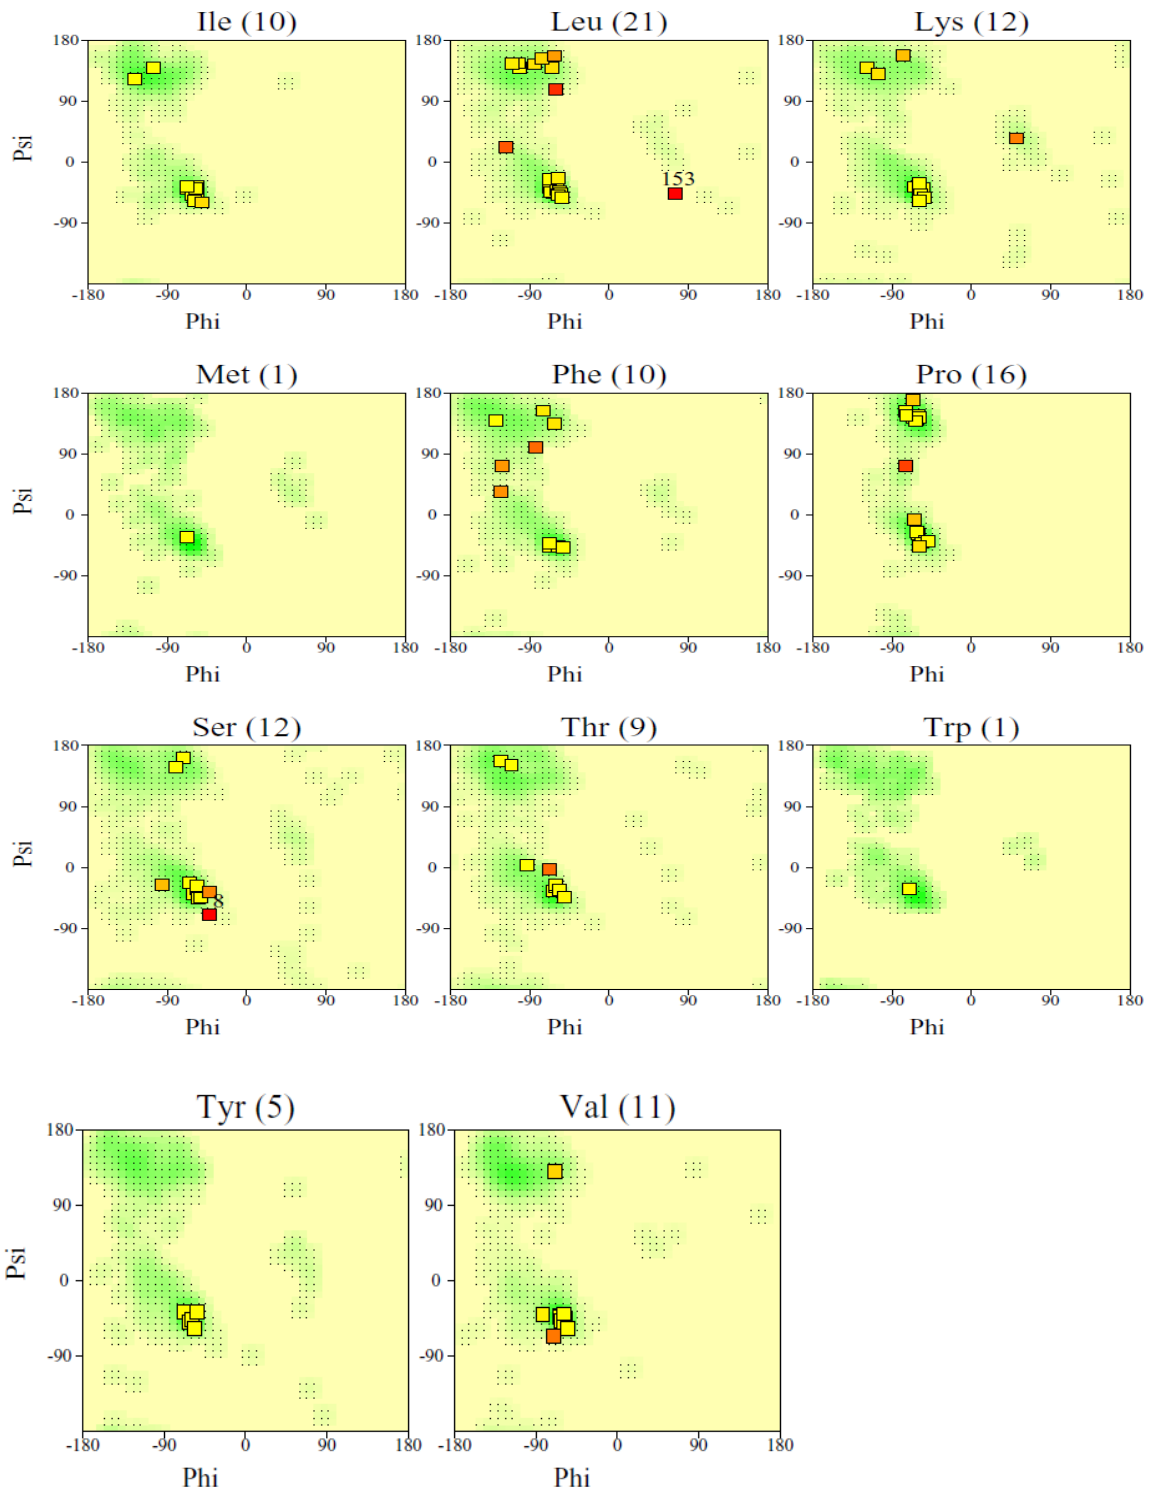

## b) Main chain bond length

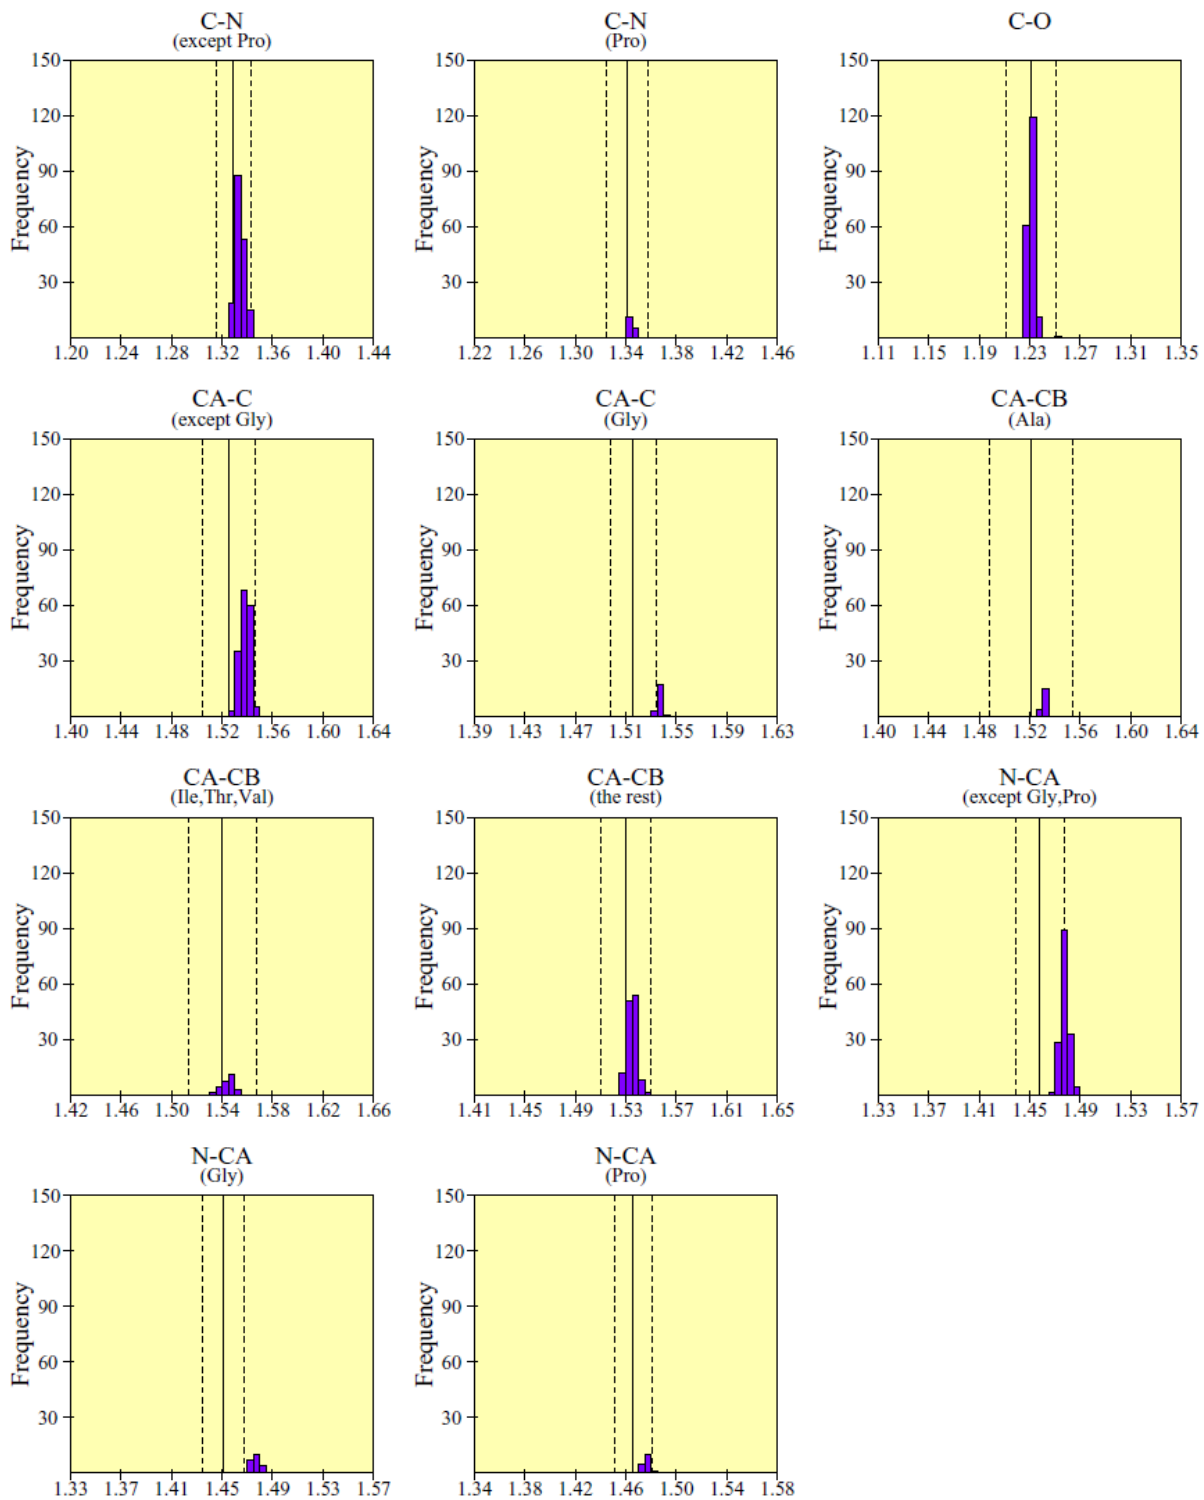

Black bars > 2.0 st. devs. from mean.

Solid and dashed lines represent the mean and standard deviation values as per Engh & Huber small-molecule data.

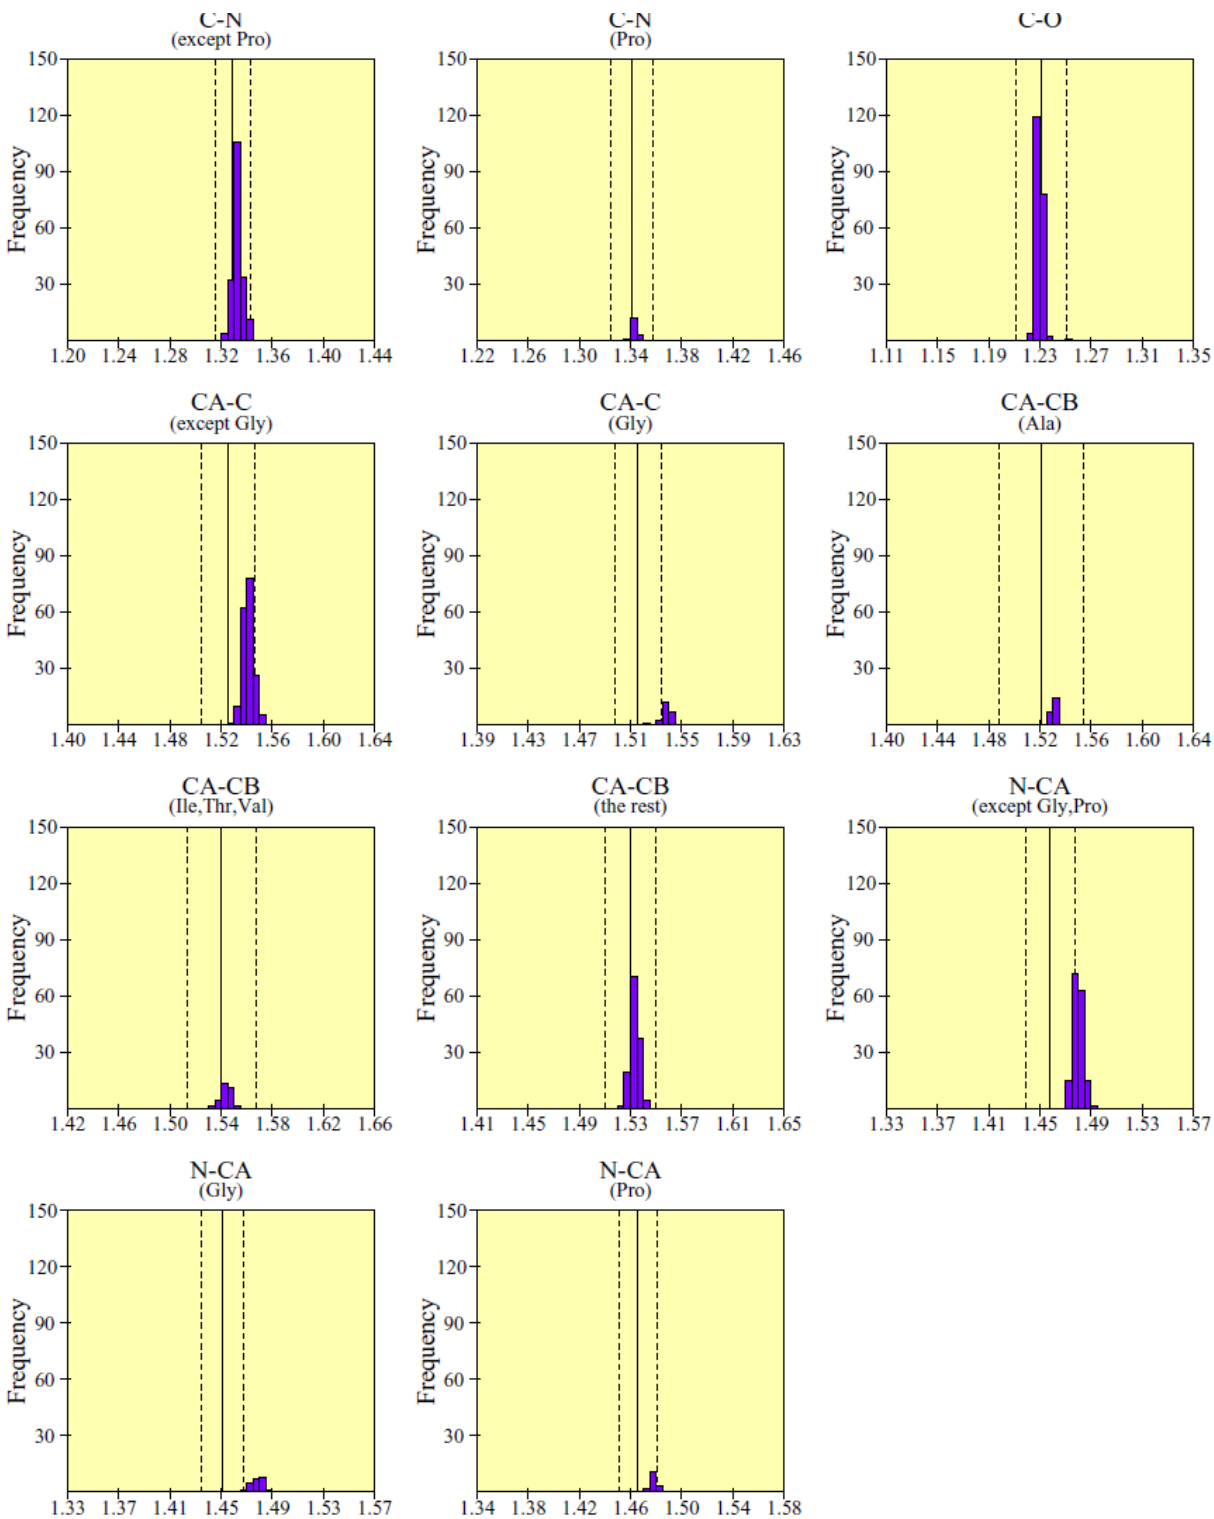

Black bars > 2.0 st. devs. from mean.

Solid and dashed lines represent the mean and standard deviation values as per Engh & Huber small-molecule data.

## c) Main chain properties

4938963

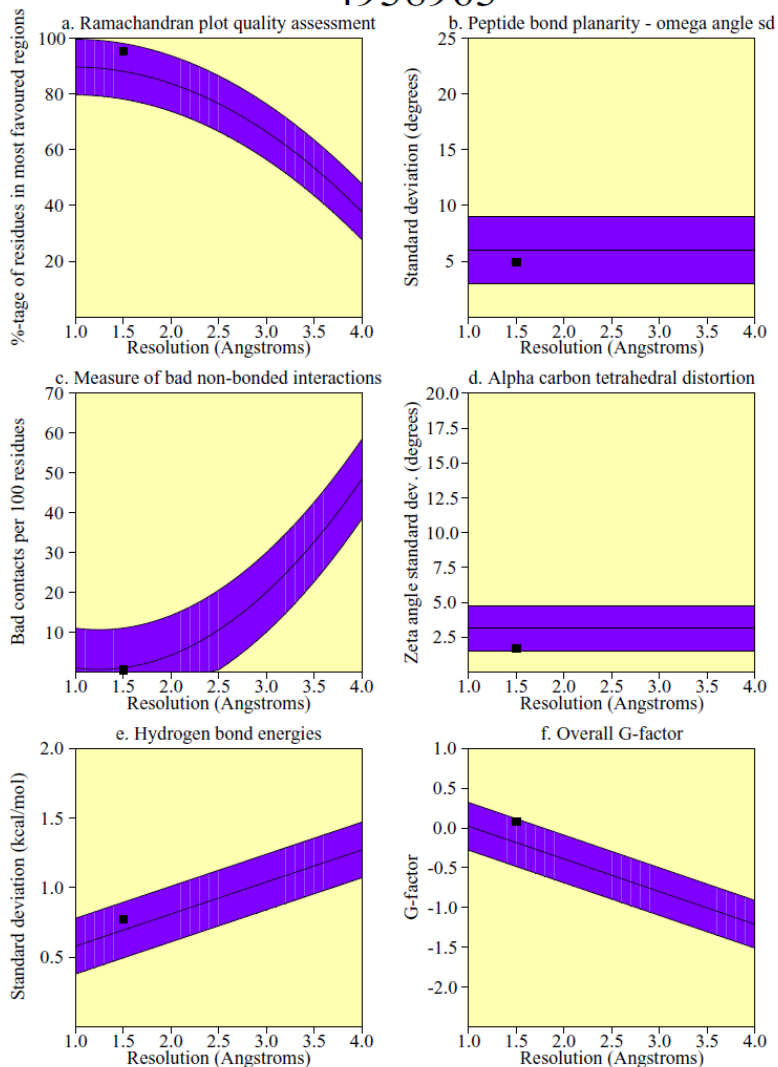

Plot statistics

| Stereochemical parameter       | No. of data pts | Parameter value | Comparison values |            | No. of band widths from mean |        |
|--------------------------------|-----------------|-----------------|-------------------|------------|------------------------------|--------|
|                                |                 |                 | Typical value     | Band width |                              |        |
| a. %-tage residues in A, B, L  | 153             | 95.4            | 88.2              | 10.0       | 0.7                          | Inside |
| b. Omega angle st dev          | 191             | 4.9             | 6.0               | 3.0        | -0.4                         | Inside |
| c. Bad contacts / 100 residues | 1               | 0.5             | 1.0               | 10.0       | -0.1                         | Inside |
| d. Zeta angle st dev           | 171             | 1.7             | 3.1               | 1.6        | -0.9                         | Inside |
| e. H-bond energy st dev        | 112             | 0.8             | 0.7               | 0.2        | 0.4                          | Inside |
| f. Overall G-factor            | 192             | 0.1             | -0.2              | 0.3        | 0.9                          | Inside |

8150565

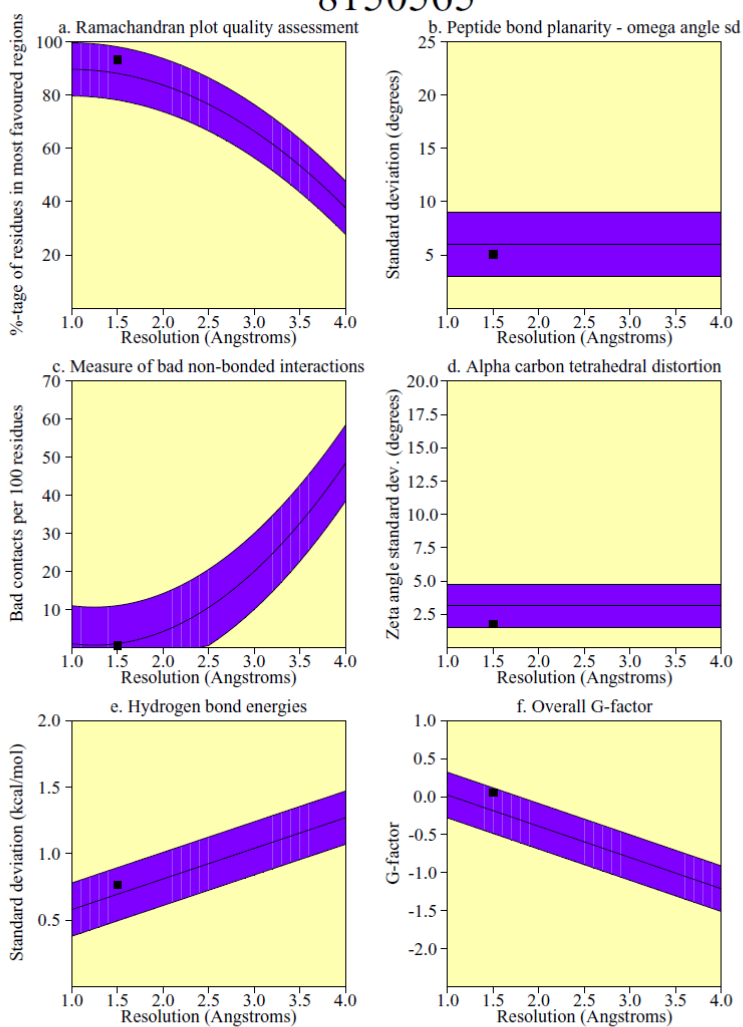

Plot statistics

| Stereochemical parameter       | No. of data pts | Parameter value | Comparison values |            | No. of band widths from mean |        |
|--------------------------------|-----------------|-----------------|-------------------|------------|------------------------------|--------|
|                                |                 |                 | Typical value     | Band width |                              |        |
| a. %-tage residues in A, B, L  | 165             | 93.3            | 88.2              | 10.0       | 0.5                          | Inside |
| b. Omega angle st dev          | 203             | 5.1             | 6.0               | 3.0        | -0.3                         | Inside |
| c. Bad contacts / 100 residues | 1               | 0.5             | 1.0               | 10.0       | -0.1                         | Inside |
| d. Zeta angle st dev           | 182             | 1.8             | 3.1               | 1.6        | -0.8                         | Inside |
| e. H-bond energy st dev        | 120             | 0.8             | 0.7               | 0.2        | 0.3                          | Inside |
| f. Overall G-factor            | 204             | 0.1             | -0.2              | 0.3        | 0.8                          | Inside |



## Main chain bond angle of ICP 7035

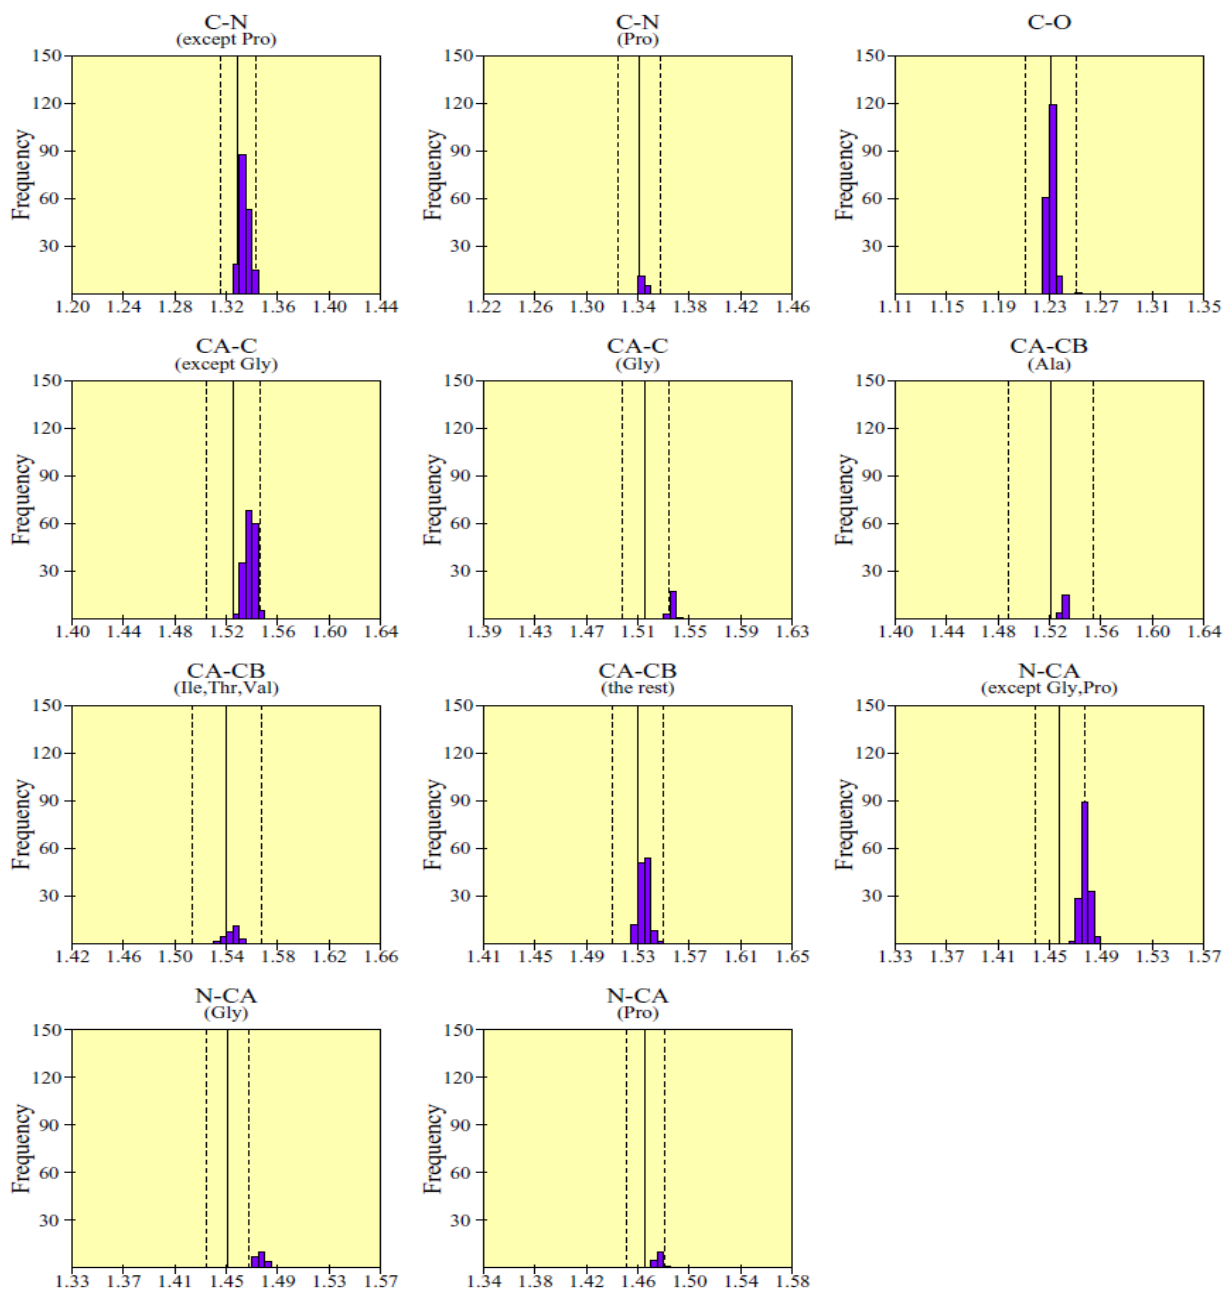

Black bars > 2.0 st. devs. from mean.

Solid and dashed lines represent the mean and standard deviation values as per Engh & Huber small-molecule data.

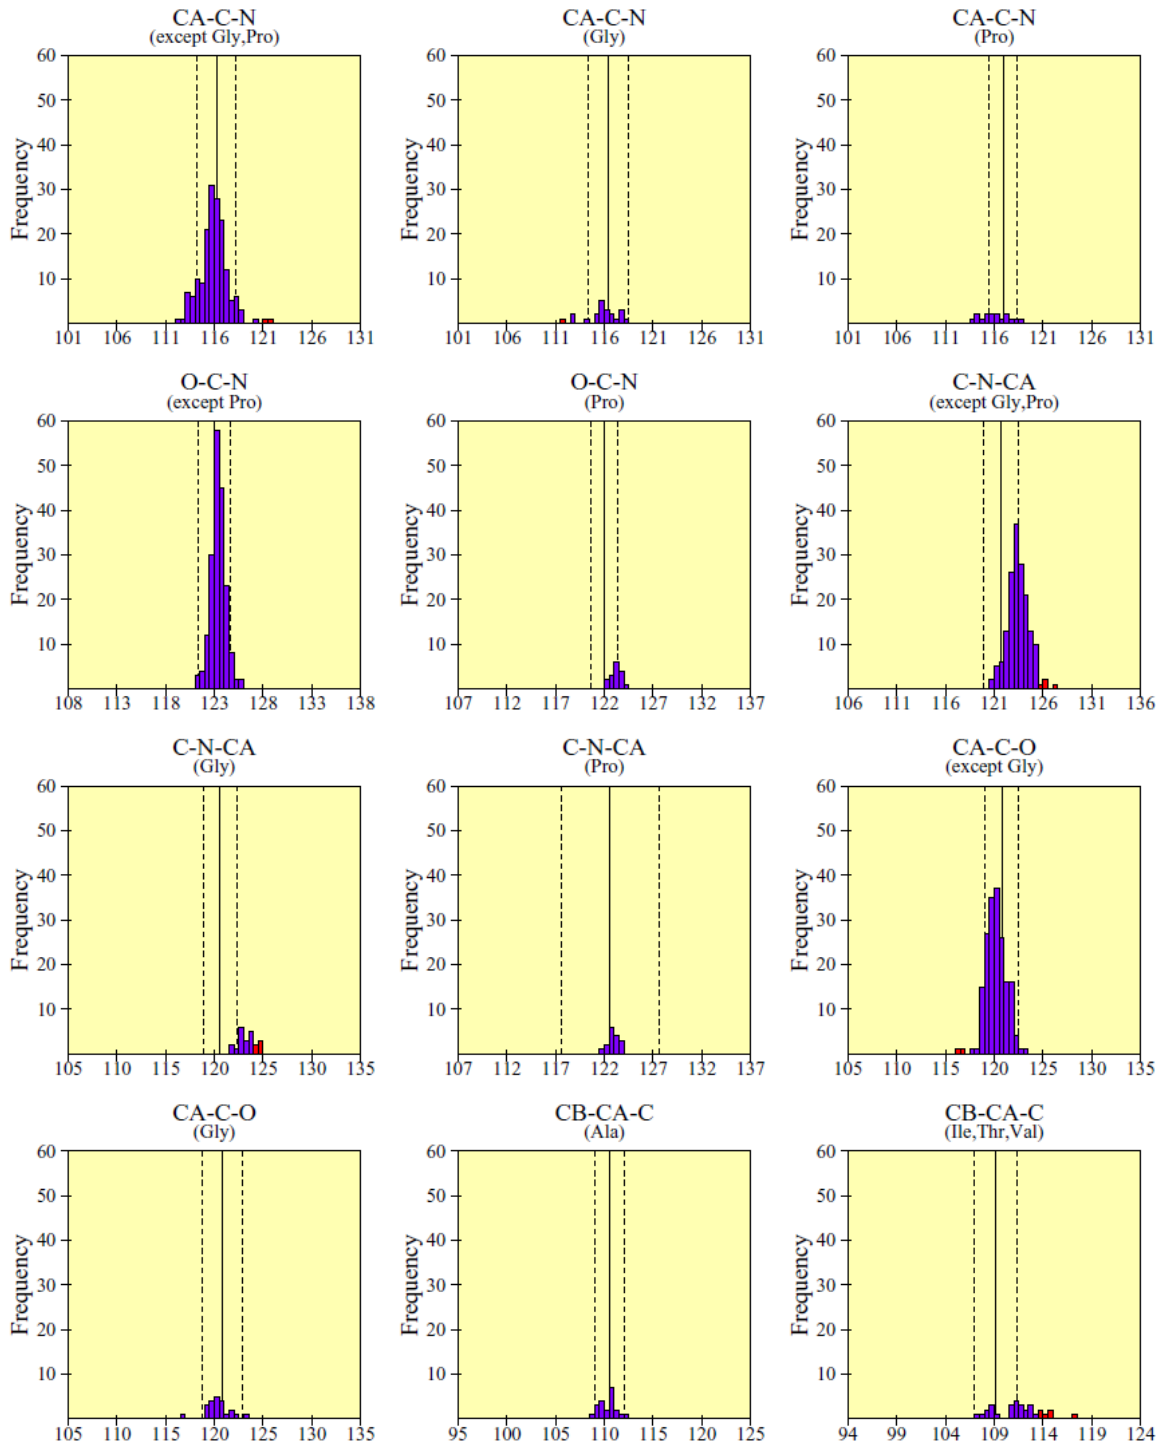

Black bars > 2.0 st. devs. from mean.

Solid and dashed lines represent the mean and standard deviation values as per Engh & Huber small-molecule data.

## d) Side chain properties

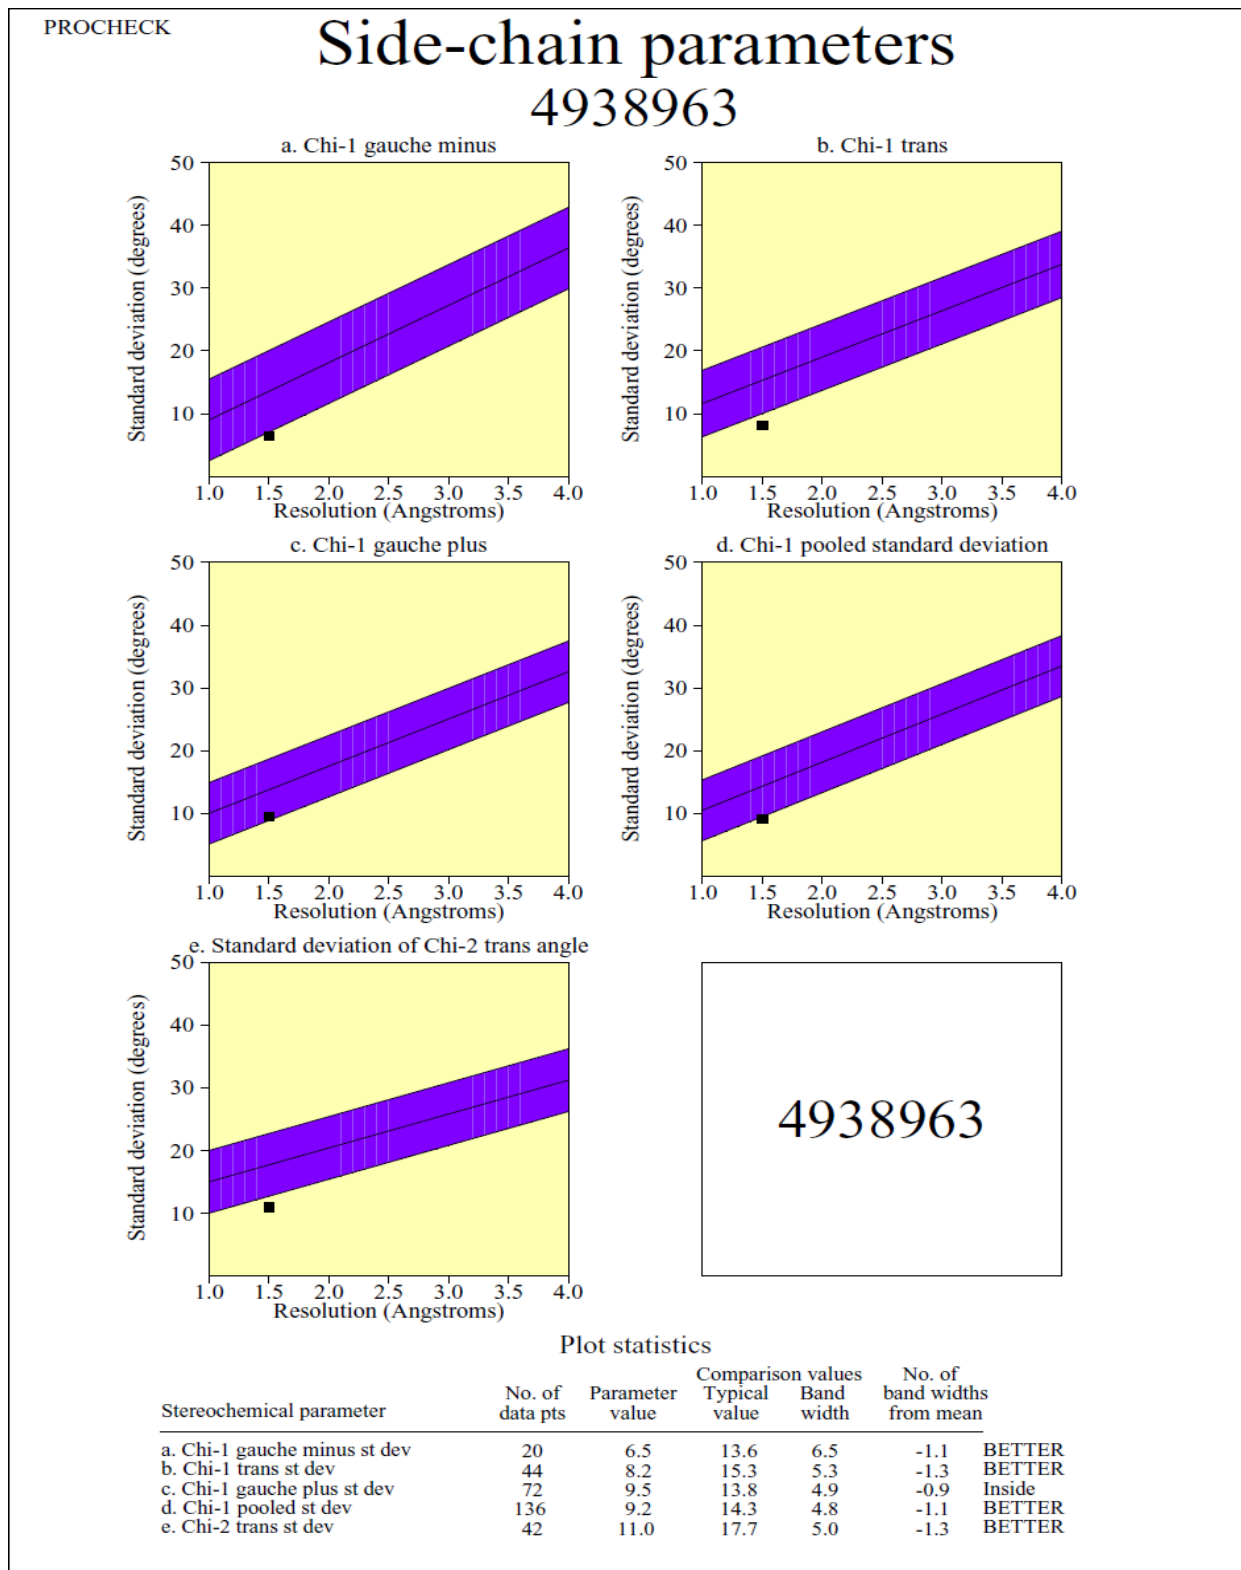

# Side-chain parameters

## 8150565

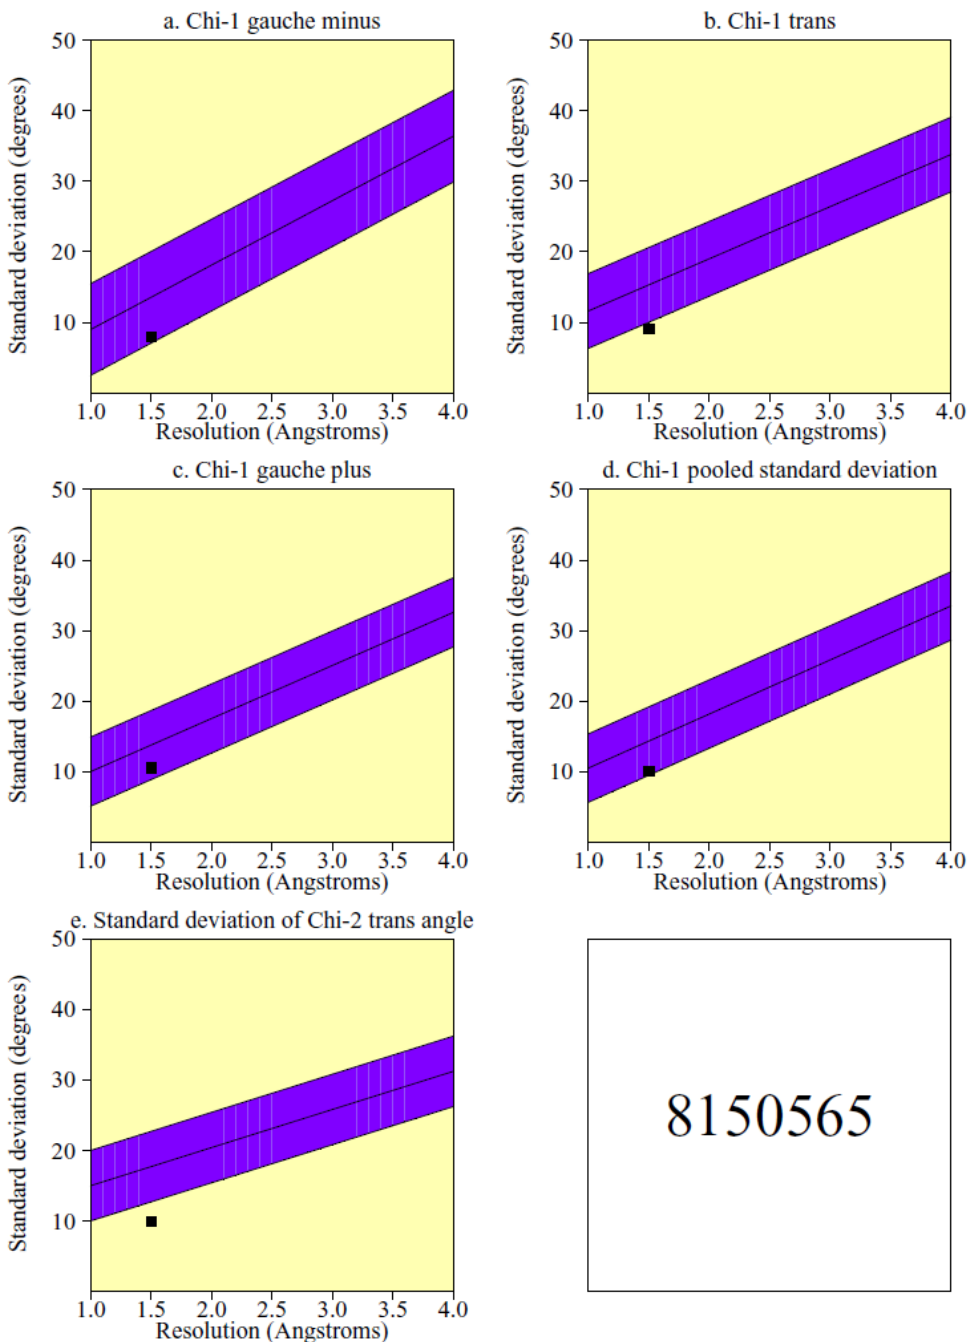

Plot statistics

| Stereochemical parameter     | No. of data pts | Parameter value | Comparison values |            | No. of band widths from mean |        |
|------------------------------|-----------------|-----------------|-------------------|------------|------------------------------|--------|
|                              |                 |                 | Typical value     | Band width |                              |        |
| a. Chi-1 gauche minus st dev | 19              | 8.0             | 13.6              | 6.5        | -0.9                         | Inside |
| b. Chi-1 trans st dev        | 49              | 9.1             | 15.3              | 5.3        | -1.2                         | BETTER |
| c. Chi-1 gauche plus st dev  | 77              | 10.5            | 13.8              | 4.9        | -0.7                         | Inside |
| d. Chi-1 pooled st dev       | 145             | 10.1            | 14.3              | 4.8        | -0.9                         | Inside |
| e. Chi-2 trans st dev        | 48              | 9.9             | 17.7              | 5.0        | -1.6                         | BETTER |

e) Residue properties

# Residue properties

## 4938963

1000

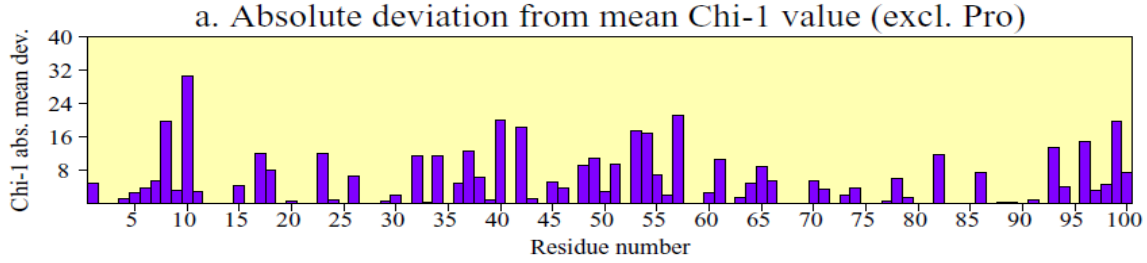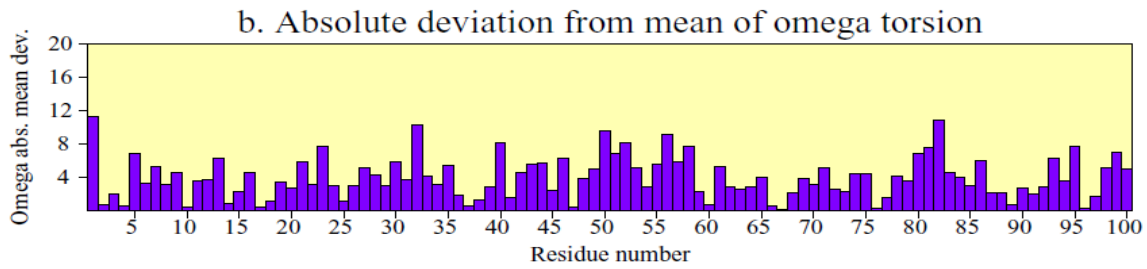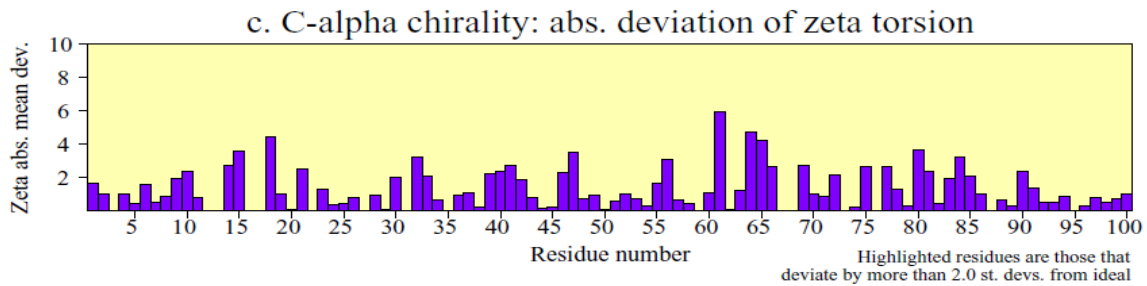

d. Secondary structure & estimated accessibility

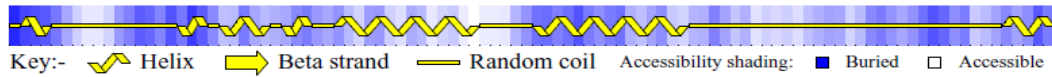

e. Sequence & Ramachandran regions

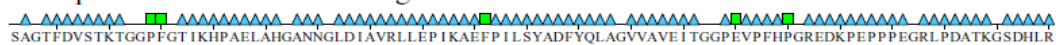

f. Max. deviation (see listing)

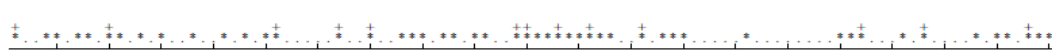

g. G-factors

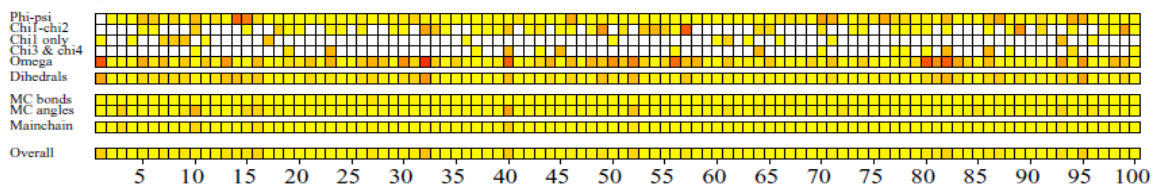

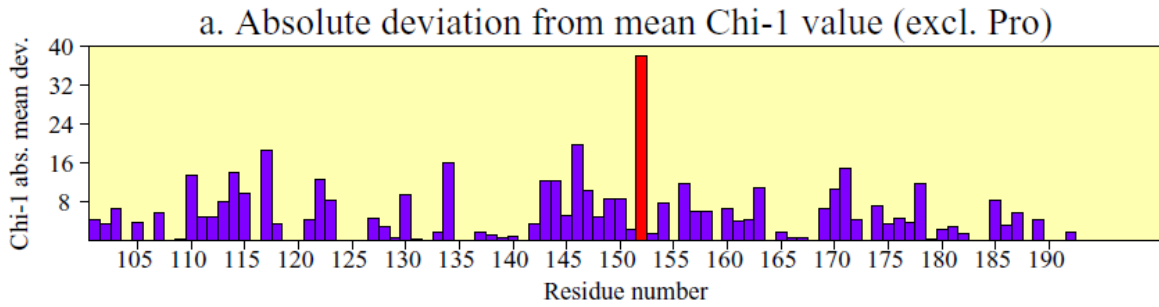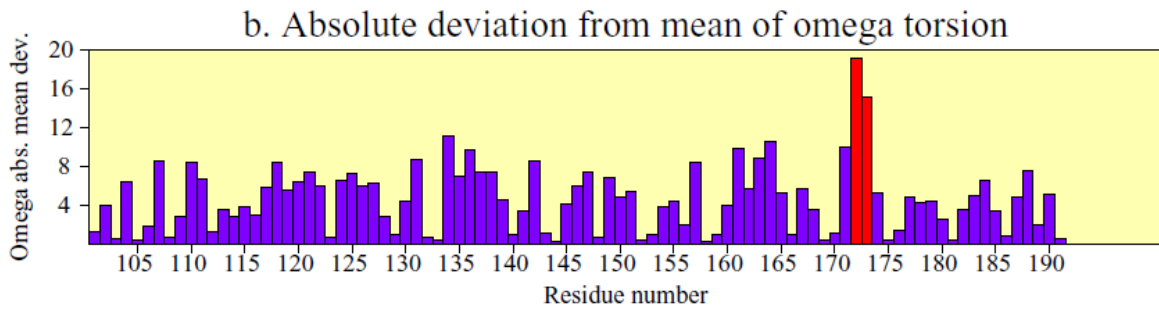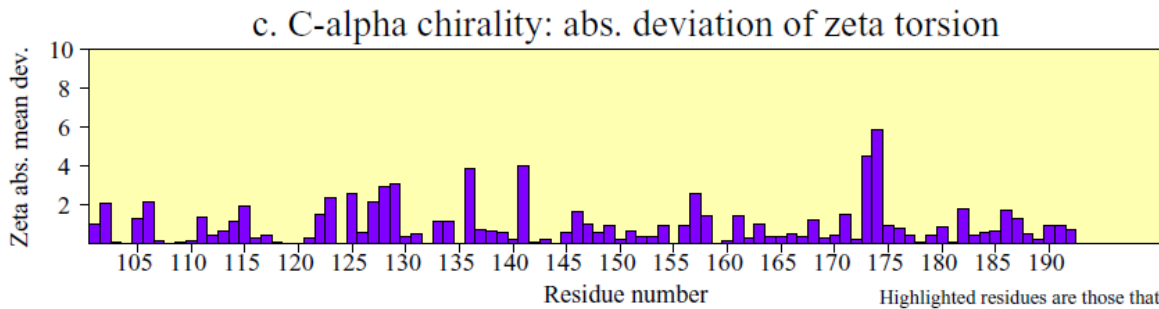

d. Secondary structure & estimated accessibility

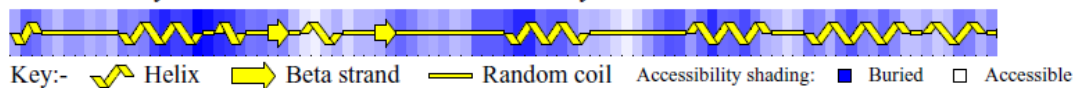

e. Sequence & Ramchandran regions

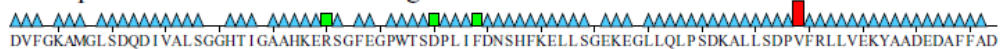

f. Max. deviation (see listing)

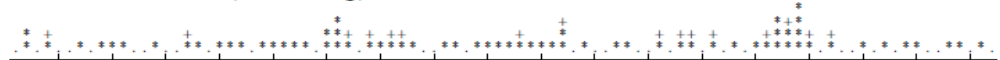

g. G-factors

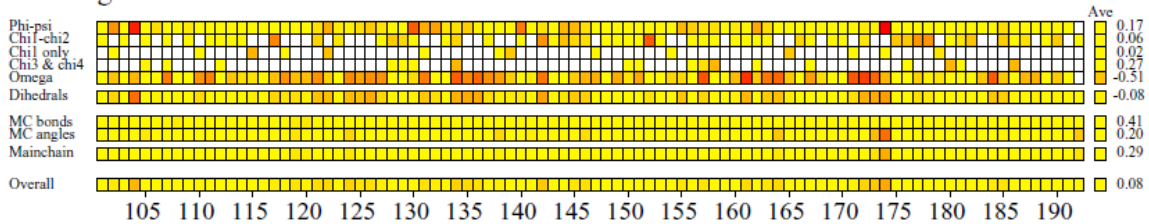

# Residue properties

## 8150565

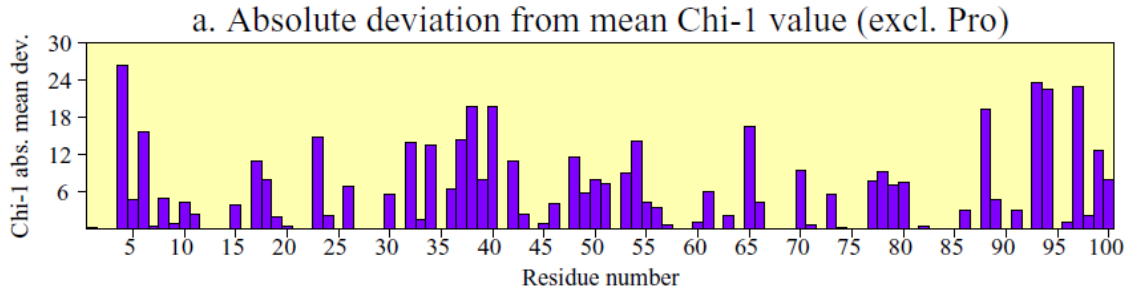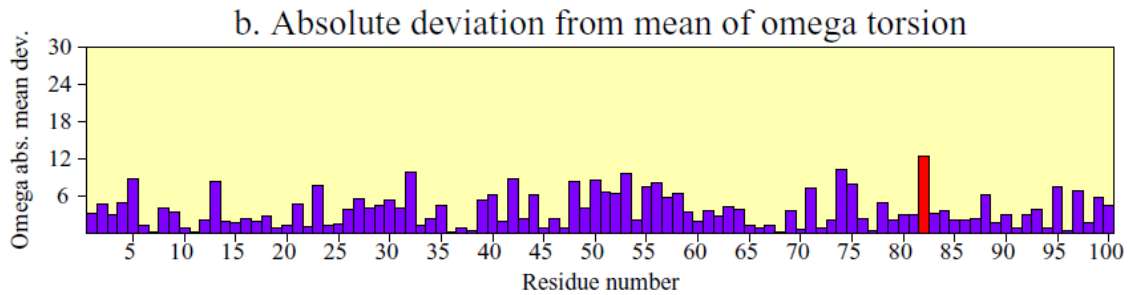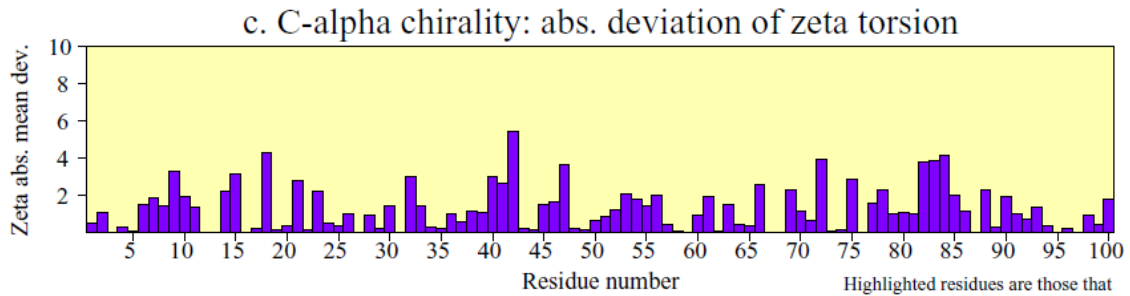

Highlighted residues are those that deviate by more than 2.0 st. devs. from ideal

d. Secondary structure & estimated accessibility

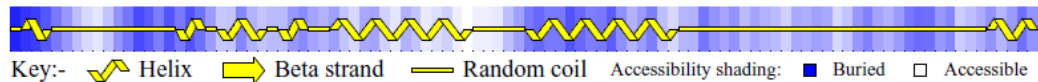

e. Sequence & Ramachandran regions Most favoured Allowed Generous Disallowed

SAGTFDVKSTKTGGPFGT IKHPAELAHGANNGLDI AVRLLLEPIKAEFPI LSAYAFYQLAGVVAVEI TGGPEVPPFHPGREDKPEPPPEGRLP DATKGS DHLR

f. Max. deviation (see listing)

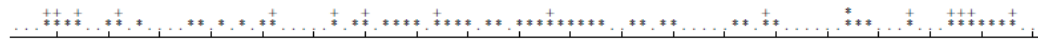

g. G-factors

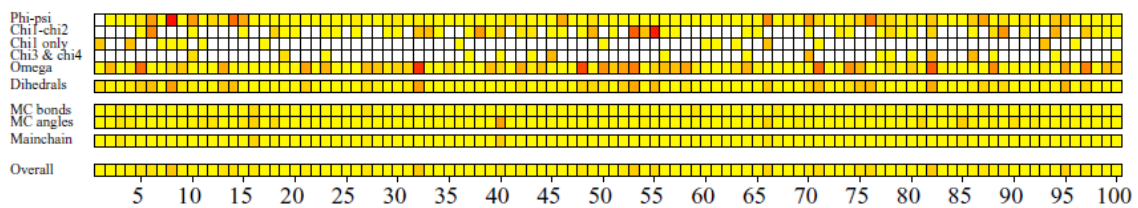

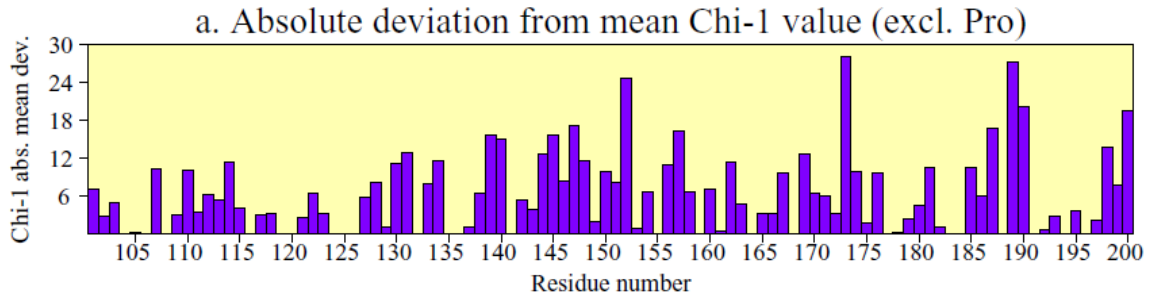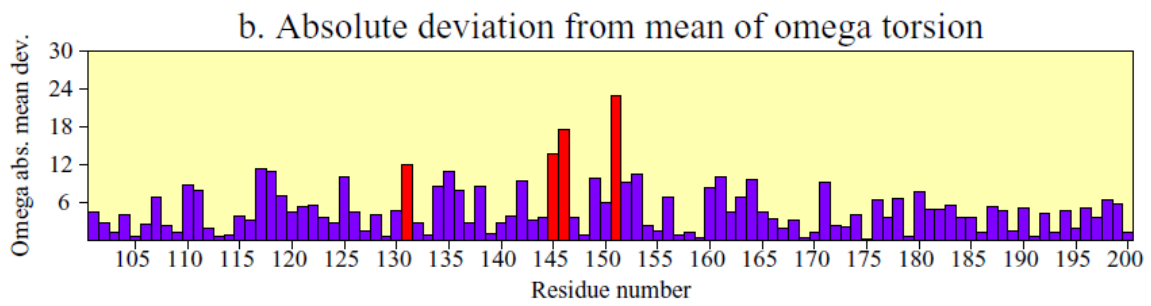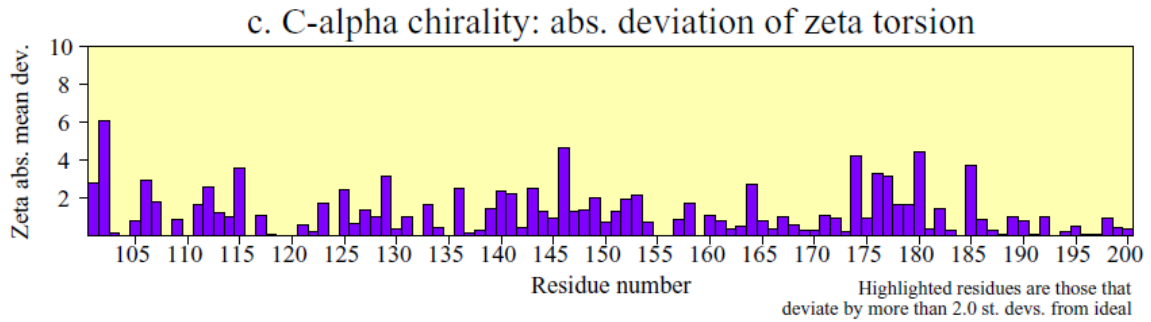

d. Secondary structure & estimated accessibility

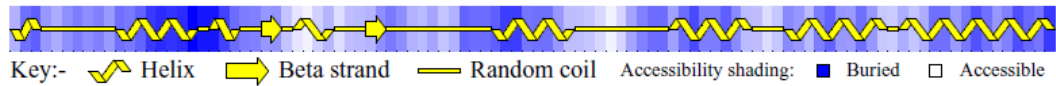

e. Sequence & Ramachandran regions

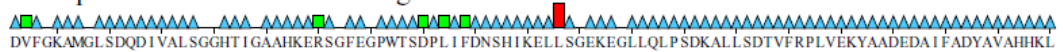

f. Max. deviation (see listing)

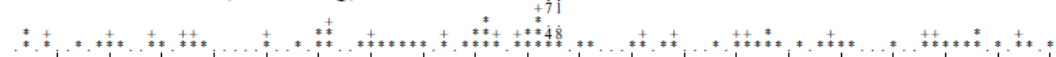

g. G-factors

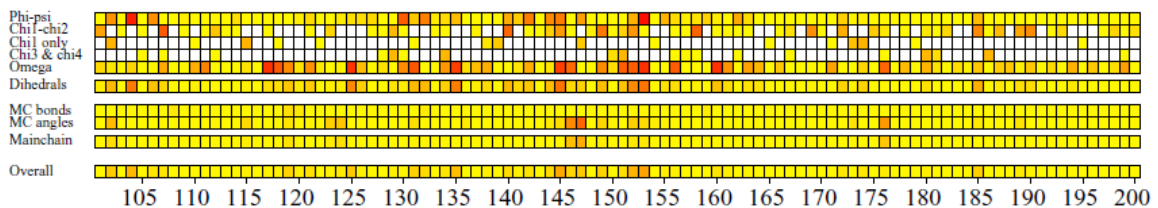



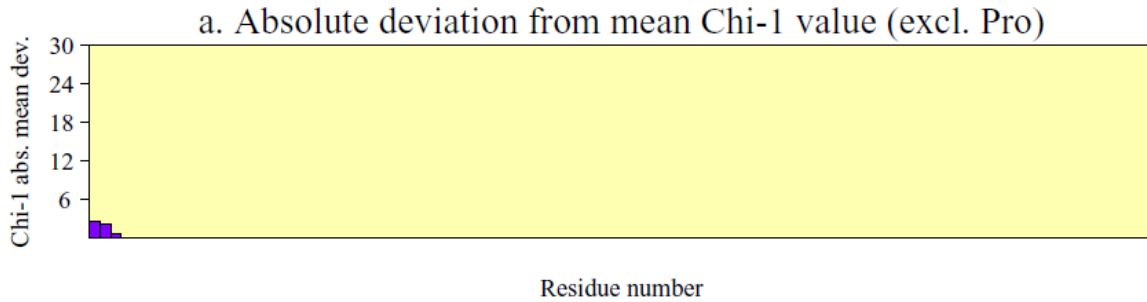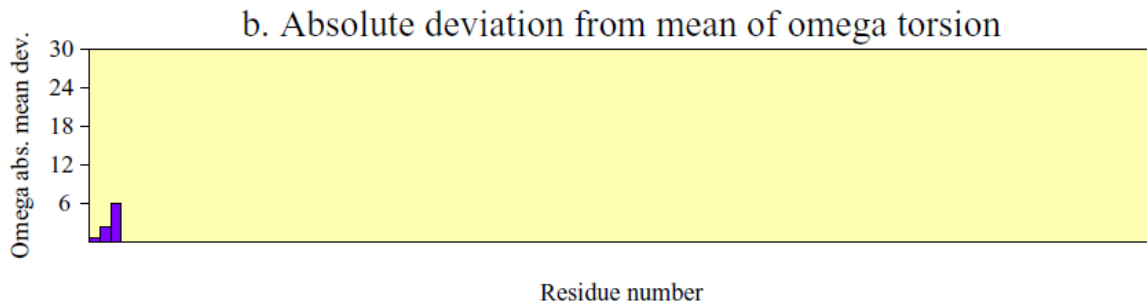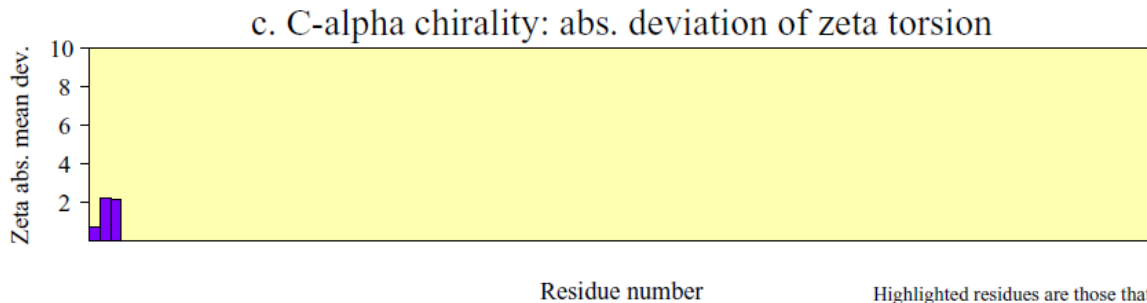

Highlighted residues are those that deviate by more than 2.0 st. devs. from ideal

d. Secondary structure & estimated accessibility

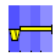

Key:- Helix Beta strand Random coil Accessibility shading: Buried Accessible

e. Sequence & Ramachandran regions

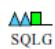

Most favoured Allowed Generous Disallowed

f. Max. deviation (see listing)

\* . \*

g. G-factors

|             | Ave   |
|-------------|-------|
| Phi-psi     | 0.11  |
| Chi1-chi2   | -0.05 |
| Chi1 only   | 0.04  |
| Chi3 & chi4 | 0.37  |
| Omega       | -0.42 |
| Dihedrals   | -0.08 |
| MC bonds    | 0.36  |
| MC angles   | 0.13  |
| Mainchain   | 0.23  |
| Overall     | 0.05  |

f) RMS distance from planarity

# RMS distances from planarity

## 4938963

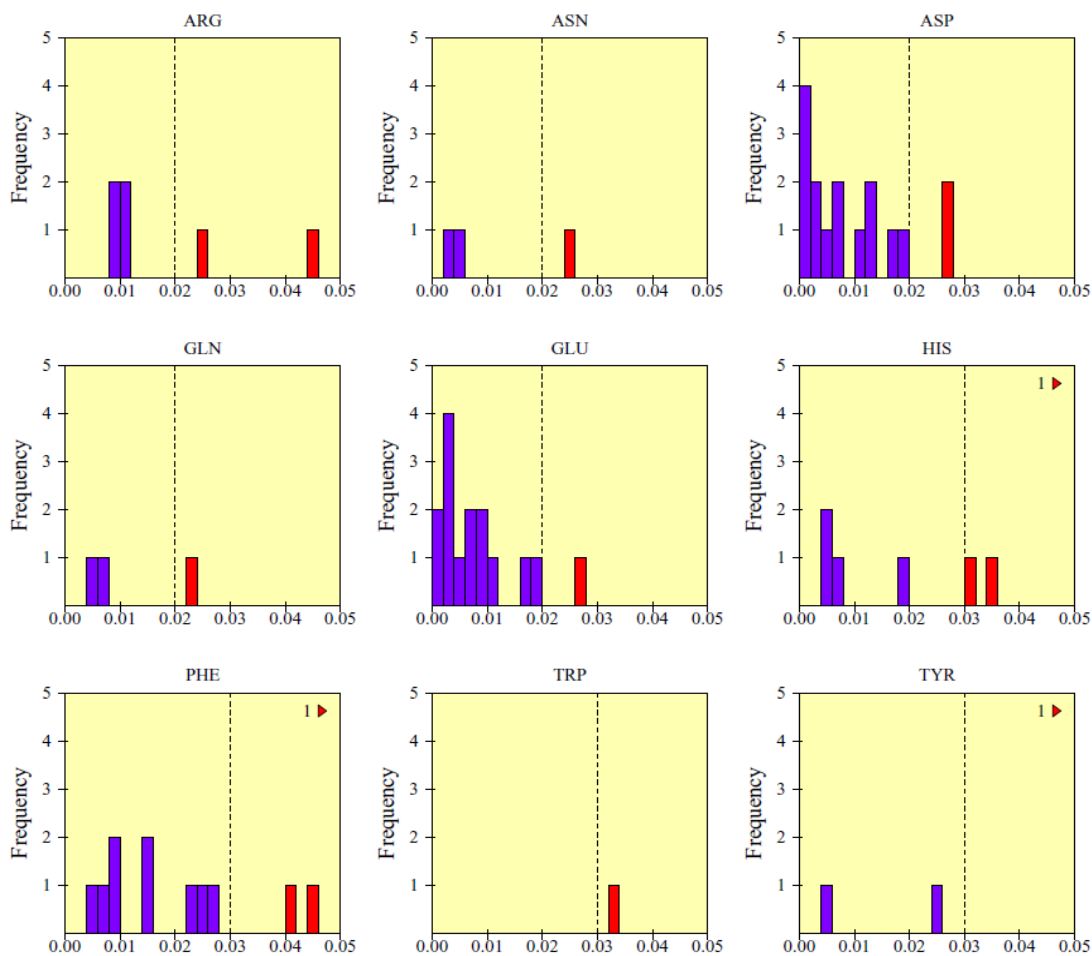

Histograms showing RMS distances of planar atoms from best-fit plane. Black bars indicate large deviations from planarity: RMS dist > 0.03 for rings, and > 0.02 otherwise.

▶ signifies data points off the graph in the direction shown.

# RMS distances from planarity

## 8150565

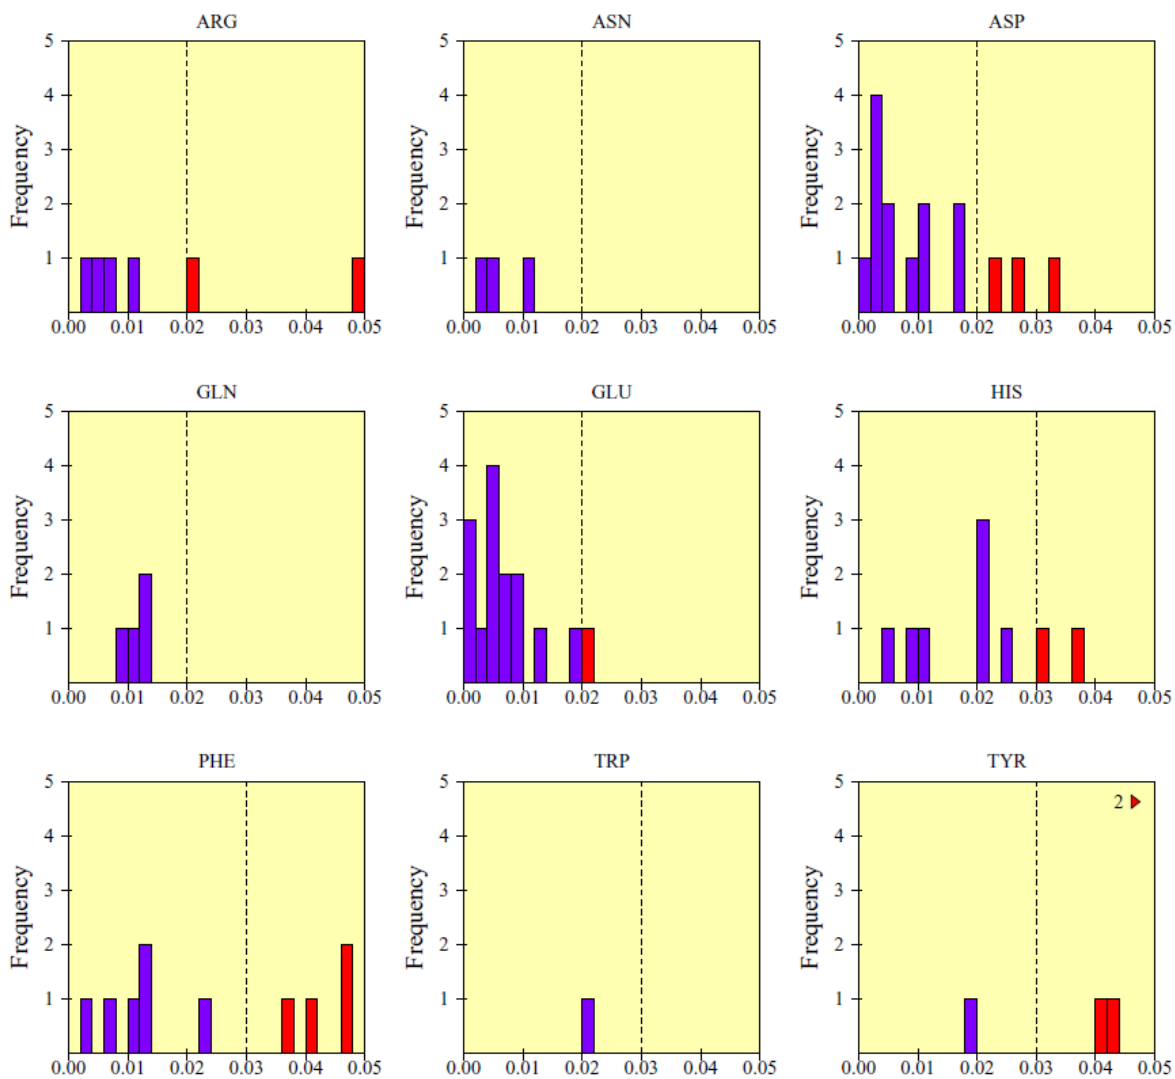

Histograms showing RMS distances of planar atoms from best-fit plane.  
 Black bars indicate large deviations from planarity: RMS dist > 0.03 for rings, and > 0.02 otherwise.

▶ signifies data points off the graph in the direction shown.

g) All Chi1-Chi2 plots of ICP 7035 and ICPL 84023 in pigeon pea

## Chi1-Chi2 plots

4938963

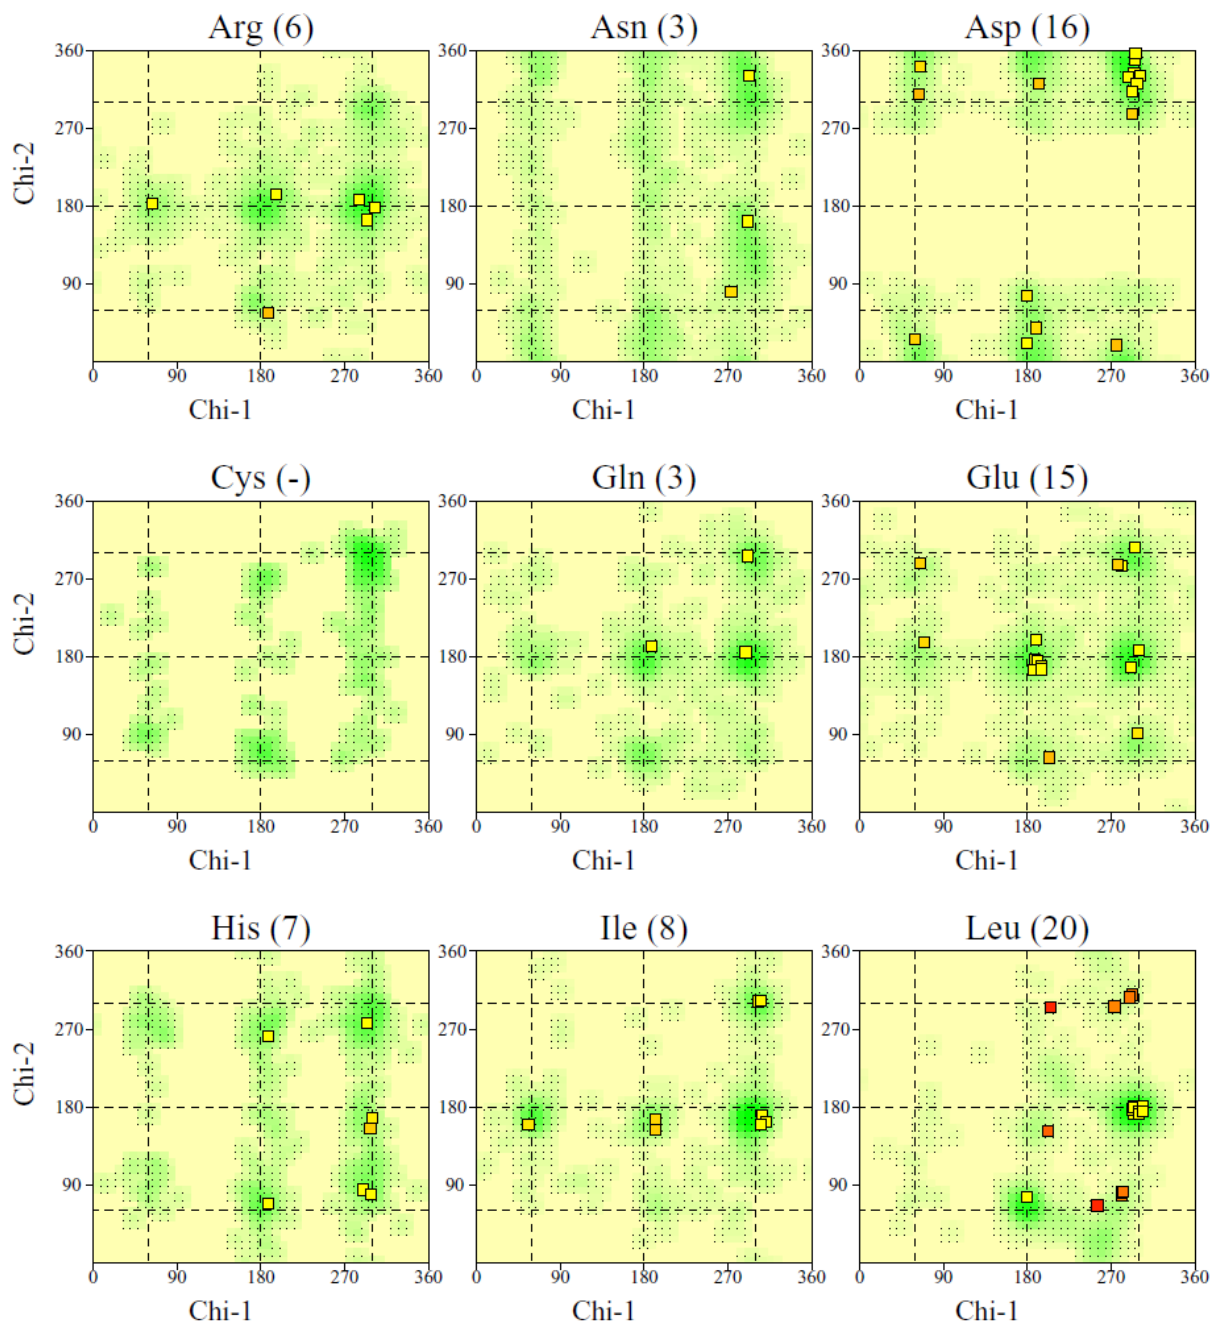

Numbers of residues are shown in brackets. Those in unfavourable conformations (score < -3.00) are labelled. Shading shows favourable conformations as obtained from an analysis of 163 structures at resolution 2.0Å or better.

# Chi1-Chi2 plots

4938963

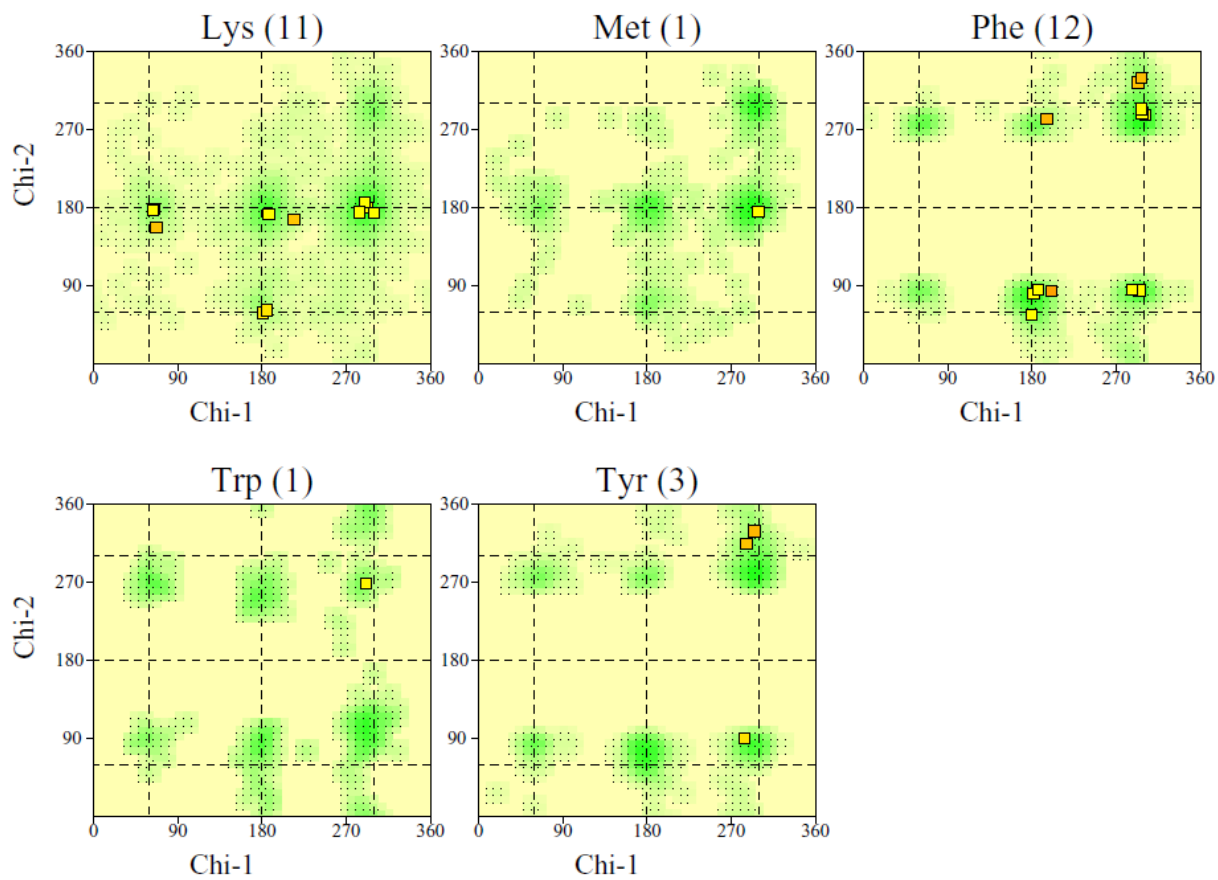

# Chi1-Chi2 plots

8150565

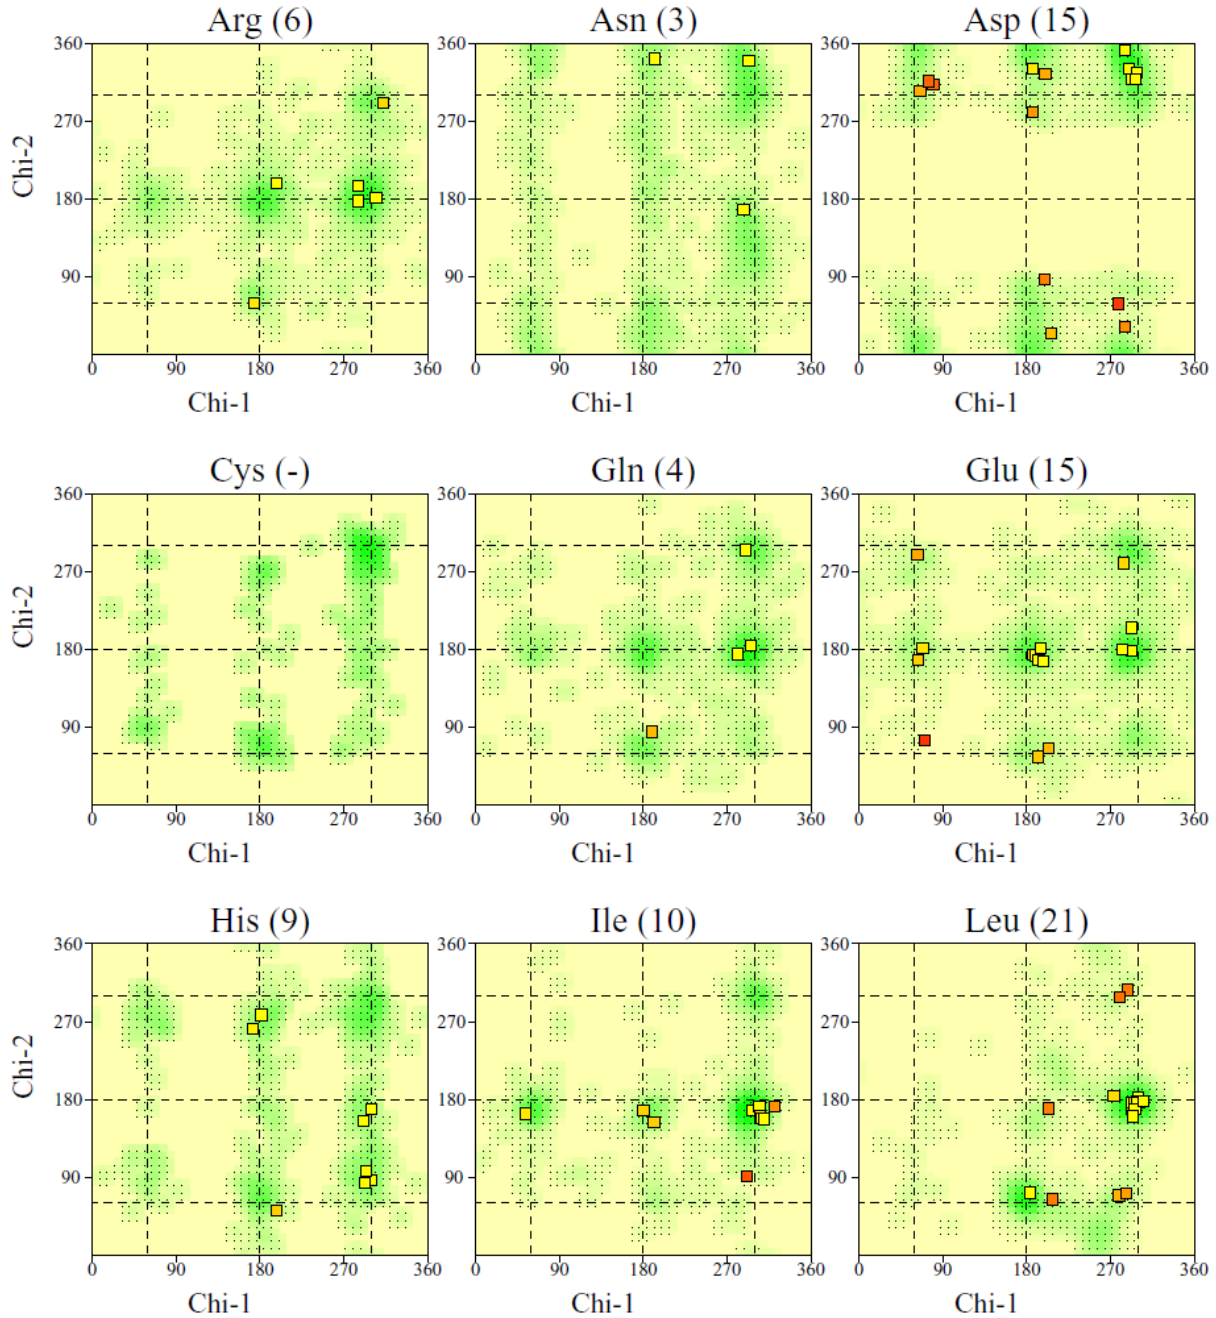

Numbers of residues are shown in brackets. Those in unfavourable conformations (score < -3.00) are labelled. Shading shows favourable conformations as obtained from an analysis of 163 structures at resolution 2.0Å or better.

# Chi1-Chi2 plots

8150565

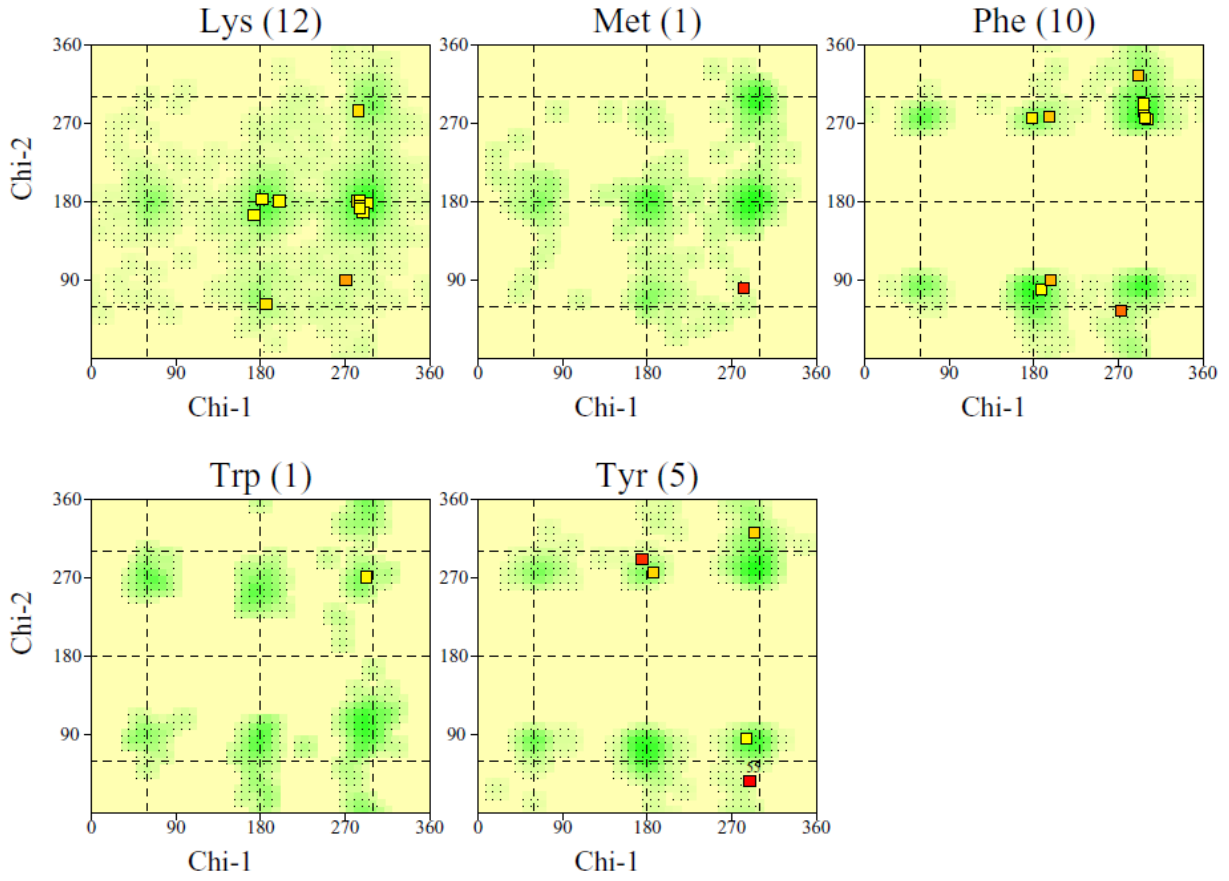

Supplement: Fig_S4-converted.pdf [file Fig_S4-converted.pdf]
