# Supplementary material for: In silico characterization and homology modeling of cytosolic APX gene predicts novel glycine residue modulating waterlogging stress response in pigeon pea
Source: PeerJ journal article supplement (doi:10.7717/peerj.10888), 2021-05-12
Supplement: Fig_S1-converted.pdf [file Fig_S1-converted.pdf]

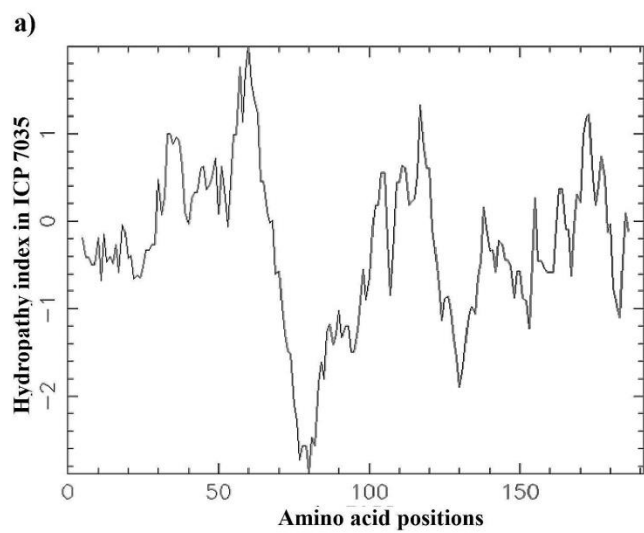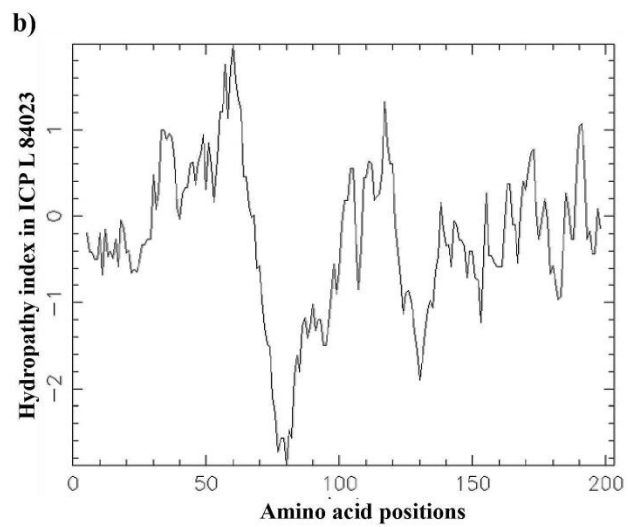

**Fig. S1:** Kyte and Doolittle hydropathy plot in a) ICP 7035 and b) ICPL 84023
