# Supplementary material for: In silico characterization and homology modeling of cytosolic APX gene predicts novel glycine residue modulating waterlogging stress response in pigeon pea
Source: PeerJ journal article supplement (doi:10.7717/peerj.10888), 2021-05-12
Supplement: Fig_S2-converted.pdf [file Fig_S2-converted.pdf]

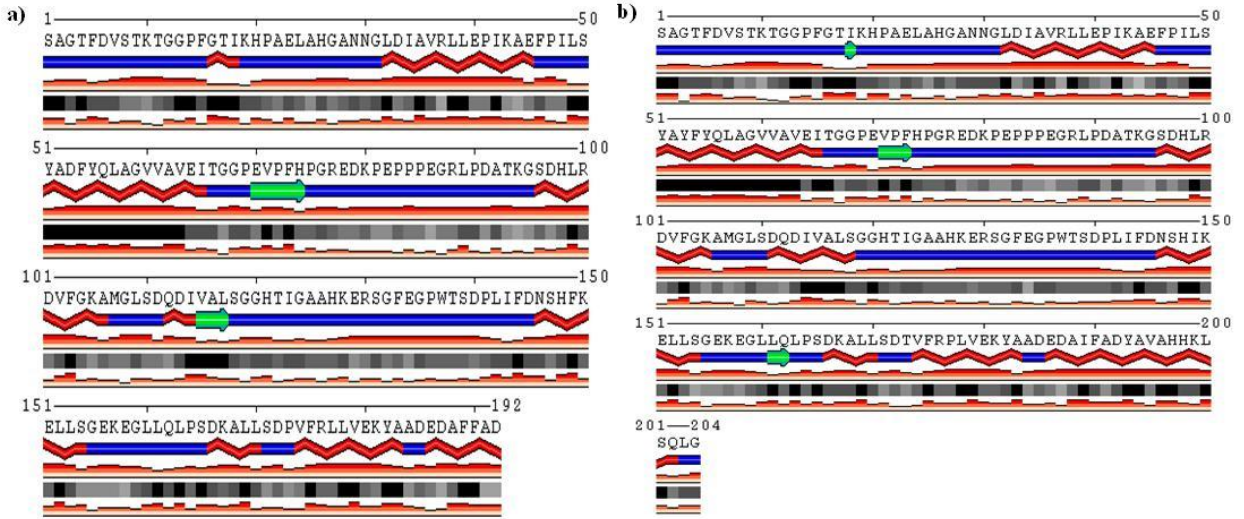

**Fig. S2:** Transmembrane domain structure prediction in a) ICP 7035 and b) ICPL 84023 where the alpha-helices are annotated with a red line, C coiled structure marked with a blue line, and the beta-sheet region is marked with green arrow.
