# Supplementary material for: In silico characterization and homology modeling of cytosolic APX gene predicts novel glycine residue modulating waterlogging stress response in pigeon pea
Source: PeerJ journal article supplement (doi:10.7717/peerj.10888), 2021-05-12
Supplement: Fig_S5-converted.pdf [file Fig_S5-converted.pdf]

**Fig. S5: Verify 3D image of a) ICP 7035 (84.38% of the residues have averaged 3D-1D score  $\geq 0.2$ ) and b) ICPL 84023 (87.25% of the residues have averaged 3D-1D score  $\geq 0.2$ )**

**a)**

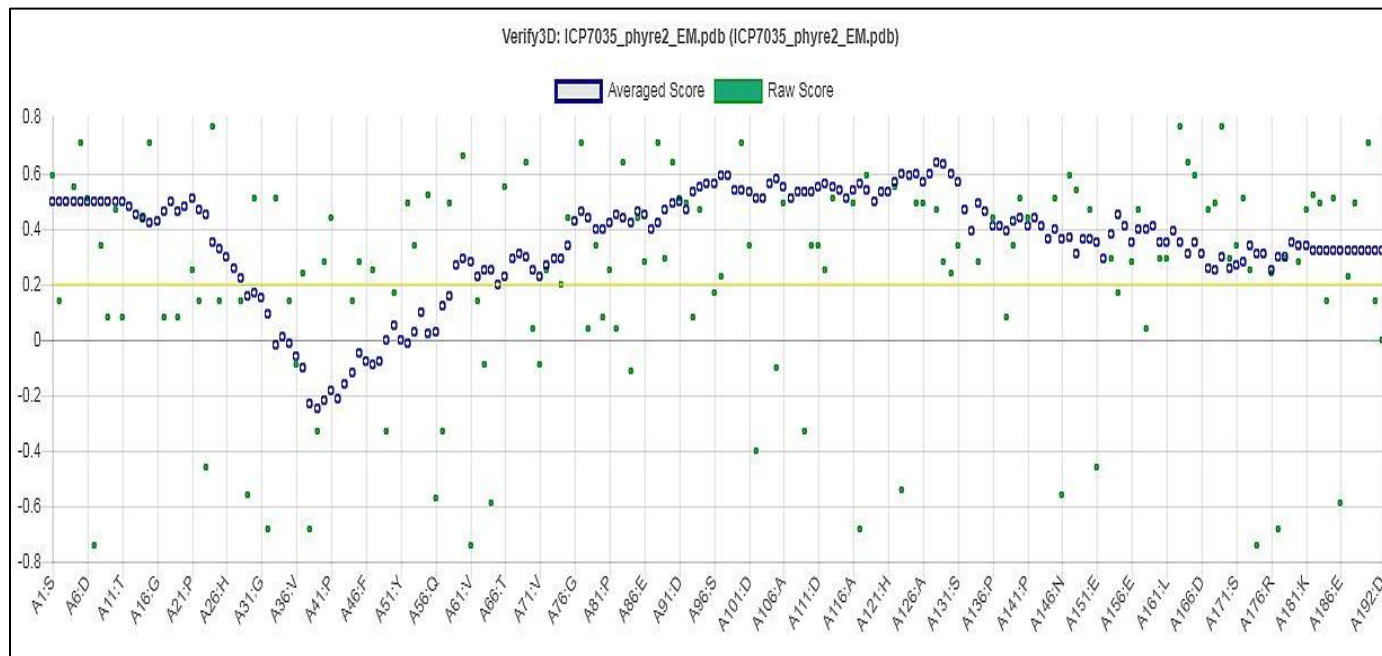

**b)**

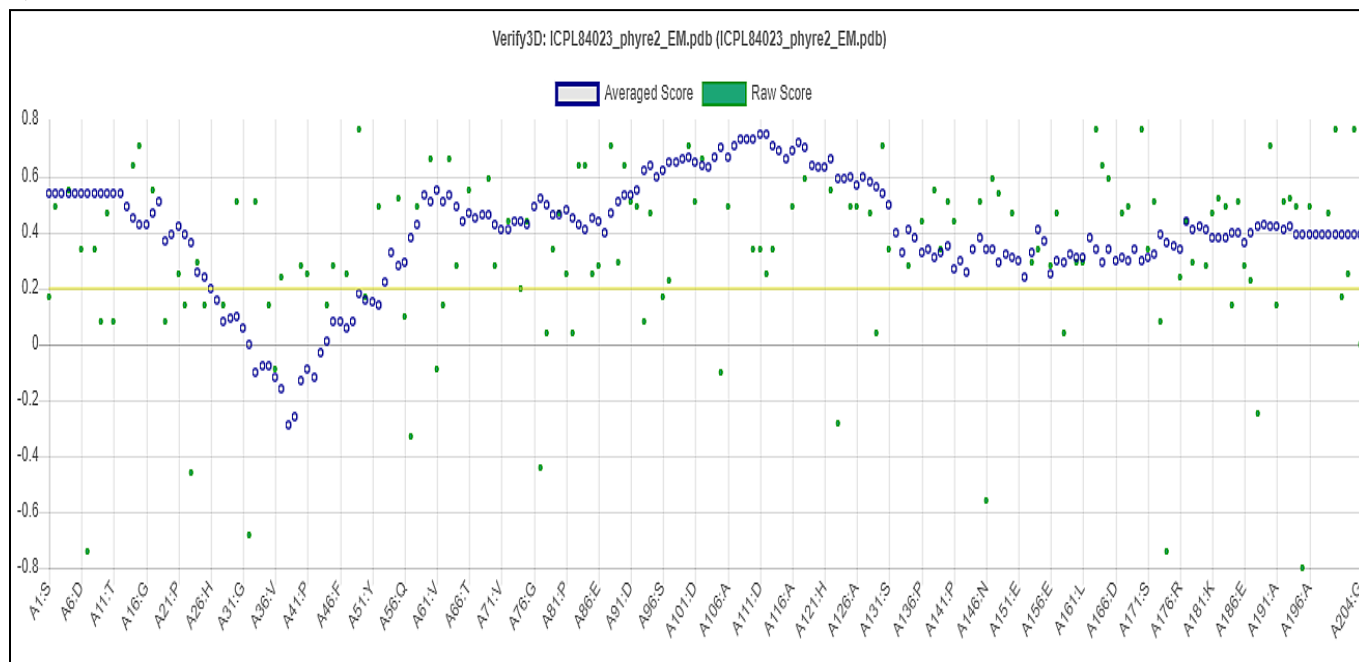

a)

Overall quality factor\*\*: 95.055

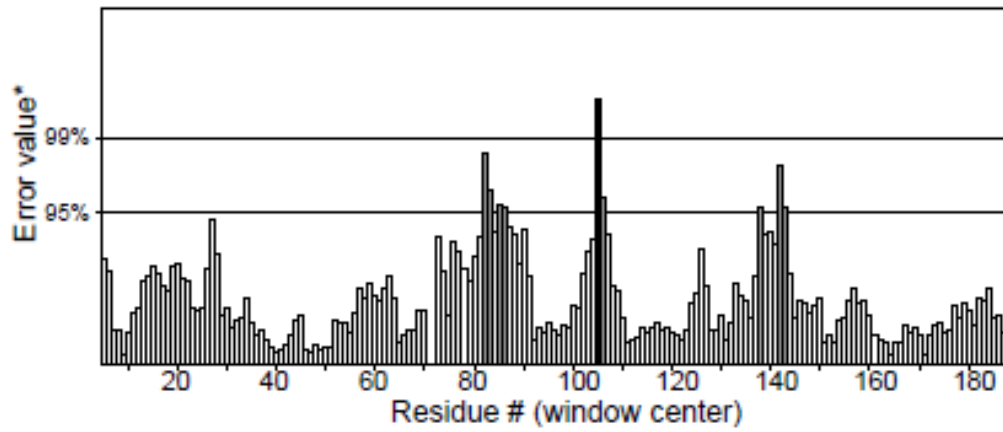

b)

Overall quality factor\*\*: 92.784

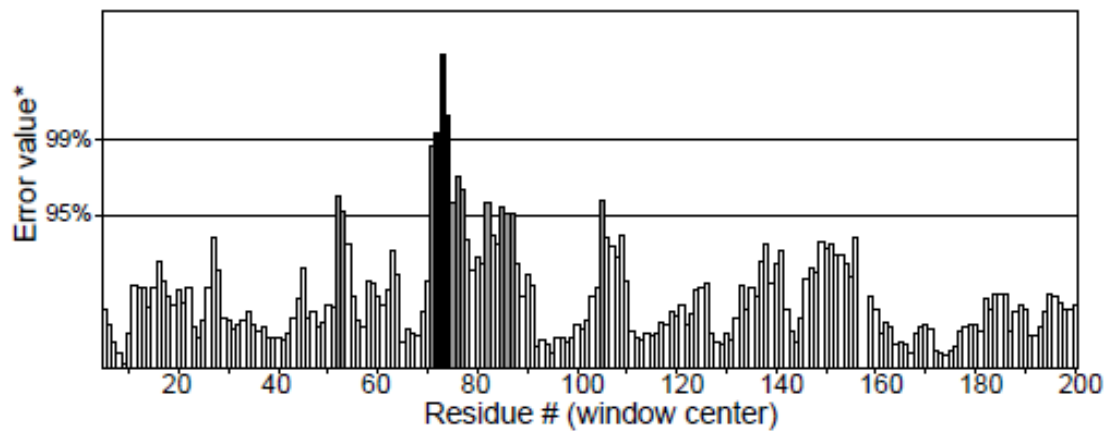

**ERRAT results of a) ICP 7035 and b) ICPL 84023 showing overall quality factor.**

a)

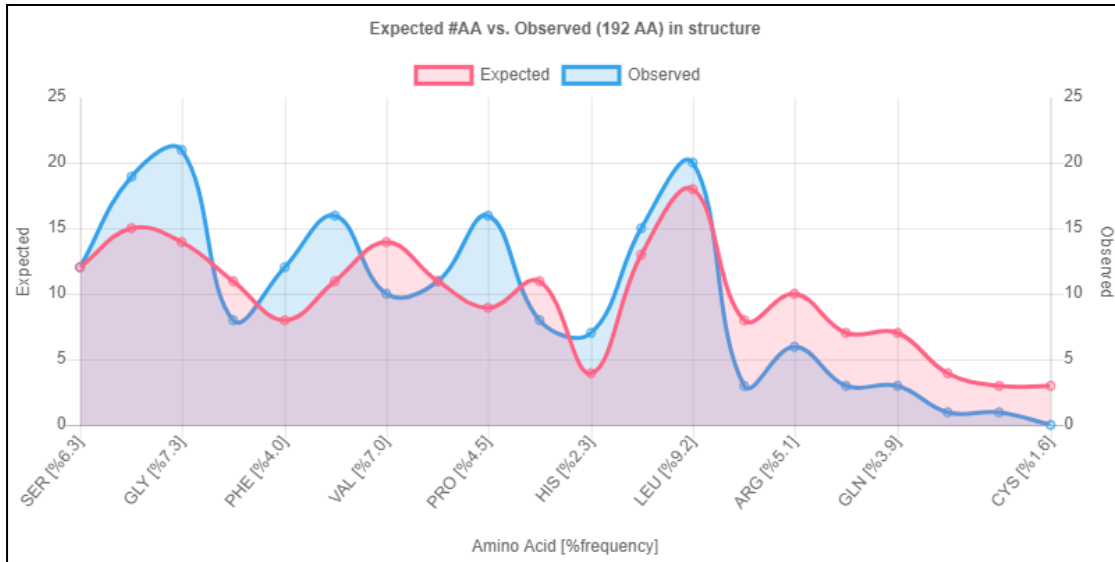

b)

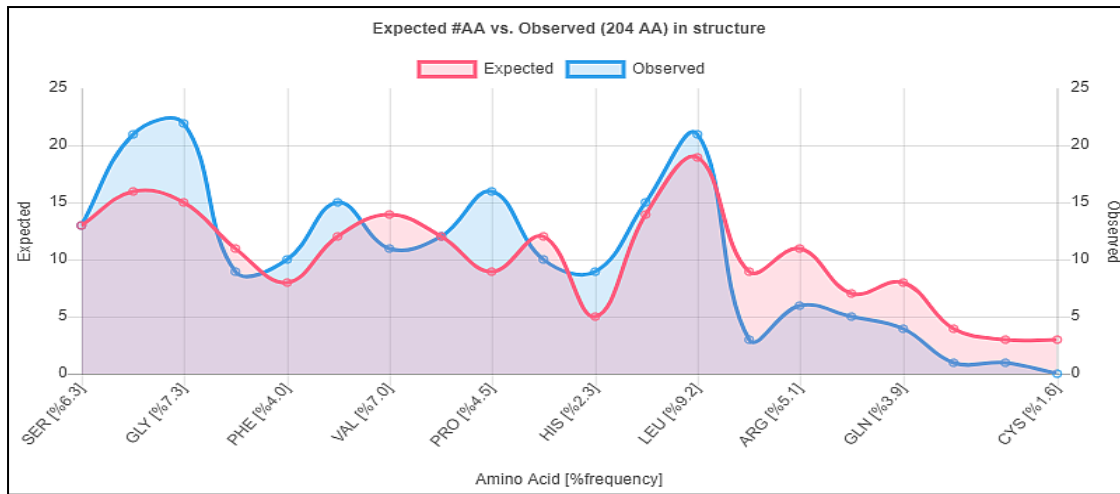

**SAVES result of a) ICP 7035 and b) ICPL 84023 showing expected and observed amino acid distribution.**

a)

• **PROVE**  
4938963.pdb  
Analysis of entire structure

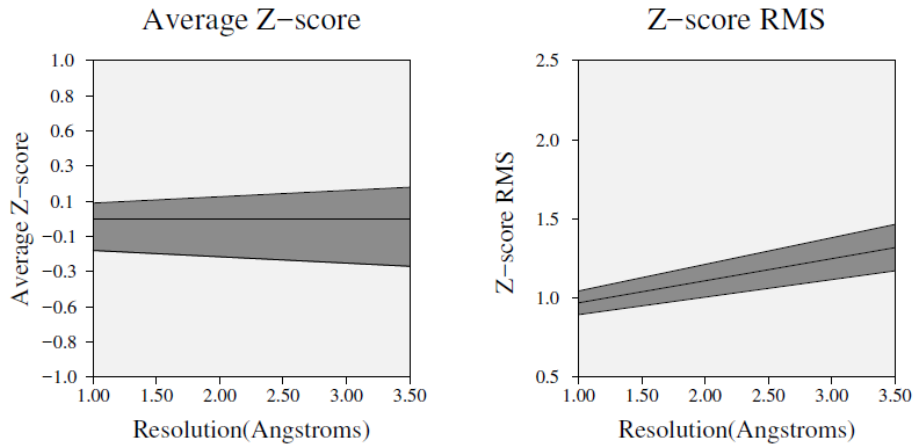

b)

**PROVE**  
5464046.pdb  
Analysis of entire structure

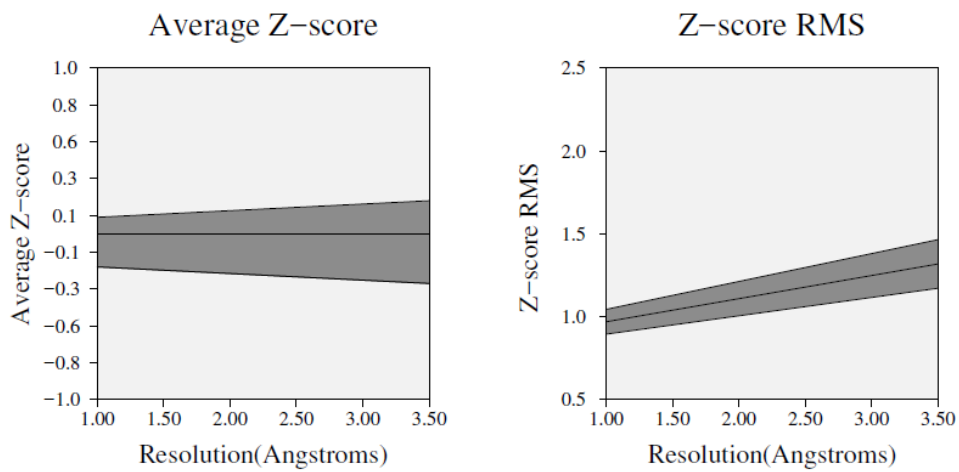

**PROVE results for a) ICP 7035 and b) ICPL 84023**

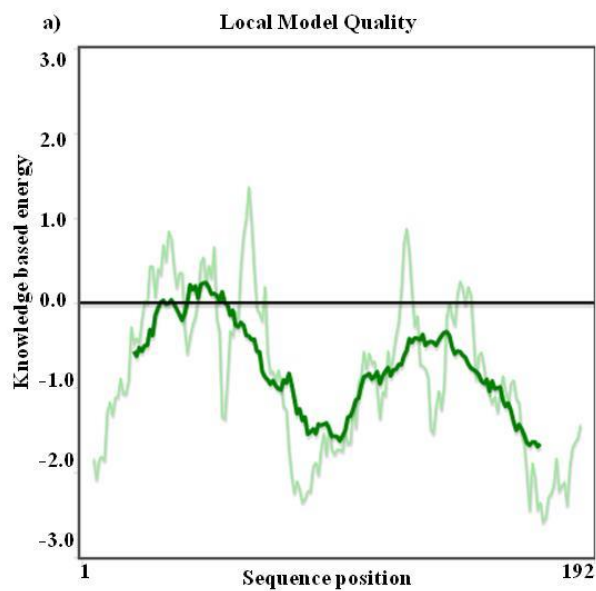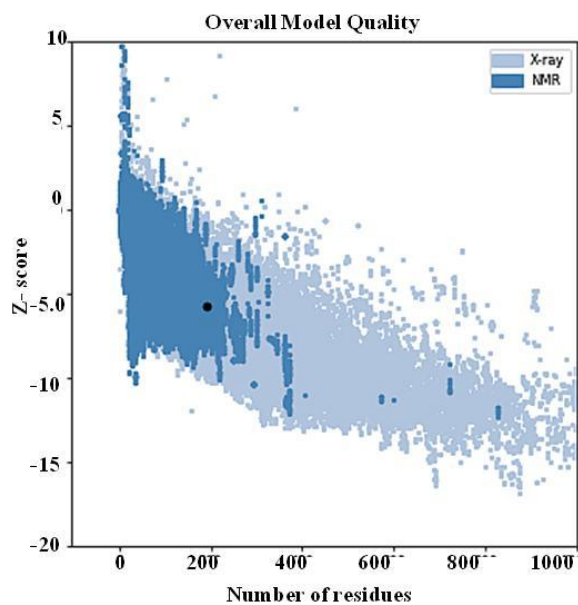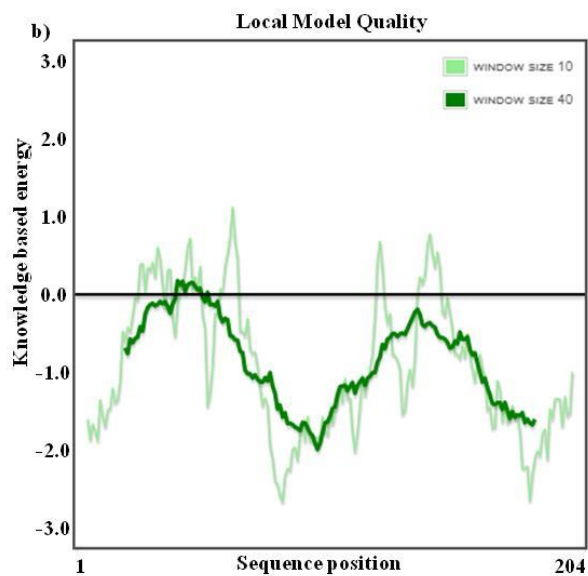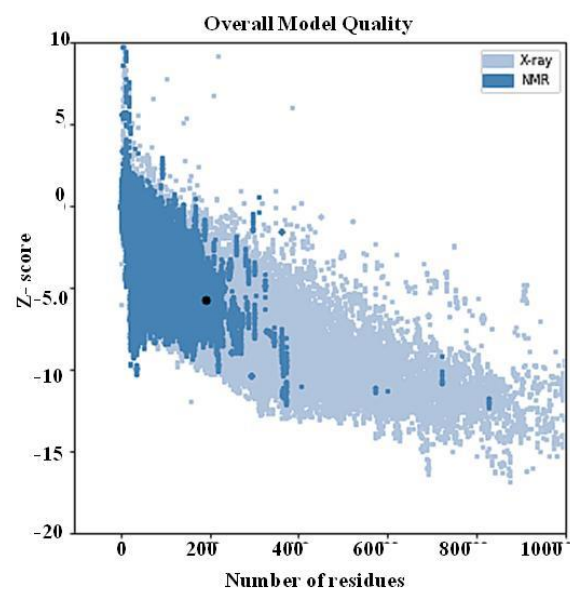

**Local and overall model quality of a) ICP 7035 and b) ICPL 84023 structure using ProSA after energy minimization.**
