# Supplementary material for: In silico characterization and homology modeling of cytosolic APX gene predicts novel glycine residue modulating waterlogging stress response in pigeon pea
Source: PeerJ journal article supplement (doi:10.7717/peerj.10888), 2021-05-12
Supplement: Fig_S6-converted.pdf [file Fig_S6-converted.pdf]

**Fig. S6: Structural view of helix, beta turn, gamma turn and distorted geometry in two pigeon pea genotypes ICP 7035 and ICPL 84023**

**A): Structural view of 14 helix in ICP 7035**



**Helix 1. Ala2-Thr4**  
Sequence: **AGT**  
Length: 3 residues



**Helix 2. Thr17-Lys19**  
Sequence: **TIK**  
Length: 3 residues



**Helix 3. Pro21-Ala25**  
Sequence: **PAELA**  
Length: 5 residues



**Helix 4. Gly27-Asn29**  
Sequence: **GAN**  
Length: 3 residues



**Helix 5. Leu32-Glu45**  
Sequence: **LDIAVRLLEPIKAE**  
Length: 14 residues



**Helix 6. Tyr51-Ile65**  
Sequence: **YADFYQLAGVVAVEI**  
Length: 15 residues



**Helix 7. Ser96-Phe103**  
Sequence: **SDHLRDVF**  
Length: 8 residues



**Helix 8. Asp111-Ser118**  
Sequence: **DQDIVALS**  
Length: 8 residues



**Helix 9. Gly119-Thr122**  
 Sequence: **GGHT**  
 Length: 4 residues



**Helix 10. Lys128-Ser131**  
 Sequence: **KERS**  
 Length: 4 residues



**Helix 11. Ser147-Ser154**  
 Sequence: **SHFKELLS**  
 Length: 8 residues



**Helix 12. Pro164-Ser171**  
 Sequence: **PSDKALLS**  
 Length: 8 residues



**Helix 13. Phe175-Ala184**  
 Sequence: **FRLLV EK YAA**  
 Length: 10 residues



**Helix 14. Glu186-Ala191**  
 Sequence: **EDAFFA**  
 Length: 6 residues

**B): Structural view of 14 helix in ICPL 84023**



**Helix 1. Ala2-Thr4**  
 Sequence: **AGT**  
 Length: 3 residues



**Helix 2. Thr17-Lys19**  
 Sequence: **TIK**  
 Length: 3 residues



**Helix 3. Pro21-Ala25**  
 Sequence: **PAELA**  
 Length: 5 residues



**Helix 4. Gly27-Asn29**  
 Sequence: **GAN**  
 Length: 3 residues



**Helix 5. Leu32-Glu45**  
 Sequence: **LDIAVRLLEPIKAE**  
 Length: 14 residues



**Helix 6. Tyr51-Ile65**  
 Sequence: **YAYFYQLAGVVAVEI**  
 Length: 15 residues



**Helix 7. Ser96-Phe103**  
 Sequence: **SDHLRDVF**  
 Length: 8 residues



**Helix 8. Asp111-Ser118**  
 Sequence: **DQDIVALS**  
 Length: 8 residues



**Helix 9. Gly119-Thr122**  
 Sequence: **GGHT**  
 Length: 4 residues



**Helix 10. Lys128-Ser131**  
 Sequence: **KERS**  
 Length: 4 residues



**Helix 11. Ser147-Ser154**  
 Sequence: **SHIKELLS**  
 Length: 8 residues



**Helix 12. Pro164-Ser171**  
 Sequence: **PSDKALLS**  
 Length: 8 residues



**Helix 13. Phe175-Ala184**  
 Sequence: **FRPLVEKYAA**  
 Length: 10 residues



**Helix 14. Glu186-Ser201**  
 Sequence: **EDAIFADYAVAHKLS**  
 Length: 16 residues

### C) beta turn in ICP 7035



### beta turn in ICPL 84023



## D) Distorted geometry of ICP 7035



## Distorted geometry of ICPL 84023



E) Gamma turn of ICP 7035 and ICPL 84023



ICP 7035



ICPL 84023
